# Supplementary material for: Synthesis and antibacterial activity of monocyclic 3-carboxamide tetramic acids
Source: PubMed Central journal article supplement (PMC3817595; doi:10.3762/bjoc.9.224), 2013-09-19
Supplement: Beilstein_J_Org_Chem-09-1899-s001.pdf [file Beilstein_J_Org_Chem-09-1899-s001.pdf]

**Supporting Information**  
**for**  
**Synthesis and antibacterial activity of monocyclic 3-**  
**carboxamide tetramic acids**

Yong-Chul Jeong and Mark G. Moloney\*

Address: Chemistry Research Laboratory, University of Oxford, Mansfield Rd,  
University of Oxford, OX1 3TA, UK

E-mail: Mark G. Moloney - mark.moloney@chem.ox.ac.uk

\*Corresponding author

**Experimental details, calculated energies (Spartan)**  
**for selected compounds and NMR spectra**

## Synthesis of compound **5**

To a solution of glycinemethyl ester hydrochloride (4.0 g, 32.4 mmol) in THF (150 mL) were added MgSO<sub>4</sub> (7.8 g, 64.8 mmol), (*R*)-citronellal (**4**, 5.0 g, 32.4 mmol) and triethylamine (3.9 g, 38.9 mmol). The reaction was stirred at room temperature overnight. Then the reaction mixture was filtered and the solvent was evaporated to give the crude imine. The crude imine was dissolved in methanol (70 mL), and sodium borohydride (2.9 g, 77.8 mmol) was slowly added to the solution at 0 °C. The reaction was stirred at room temperature for 1 hour, and then quenched with 1 N NaOH (150 mL). The mixture was extracted with ethyl acetate (100 mL x 3 times). The organic layer was dried over MgSO<sub>4</sub> and concentrated in vacuo. The residue was purified by flash column chromatography to afford pure compound **5** (880 mg, 3.87 mmol, 12% yield) as an oil. <sup>1</sup>H NMR (400 MHz, CDCl<sub>3</sub>) 5.08 (t, 1H, *J* = 7.2 Hz, CH=C), 3.72 (s, 3H, OCH<sub>3</sub>), 3.40 (s, 2H, COCH<sub>2</sub>NH), 2.65-2.54 (m, 2H, NHCH<sub>2</sub>CH<sub>2</sub>), 2.03-2.88 (m, 2H, CH<sub>2</sub>CH<sub>2</sub>CH), 1.67 (s, 3H, C(CH<sub>3</sub>)<sub>2</sub>), 1.59 (s, 3H, C(CH<sub>3</sub>)<sub>2</sub>), 1.56-1.43 (m, 2H, CH(CH<sub>3</sub>)CH<sub>2</sub>(CH<sub>2</sub>)<sub>2</sub>CH), 1.36-1.25 (m, 2H, NHCH<sub>2</sub>CH<sub>2</sub>), 1.19-1.10 (m, 1H, CH(CH<sub>3</sub>)), 0.88 (d, 3H, *J* = 6.8 Hz, CH(CH<sub>3</sub>)); <sup>13</sup>C NMR (100 MHz, CDCl<sub>3</sub>); 172.98 (C=O), 131.12 (CH=C(Me)<sub>2</sub>), 124.71 (CH=C(Me)<sub>2</sub>), 51.66 (OCH<sub>3</sub>), 50.85 (COCH<sub>2</sub>NH), 47.52 (NHCH<sub>2</sub>CH<sub>2</sub>), 37.14 (CH<sub>2</sub>CH(Me)CH<sub>2</sub>), 30.41 (CH(Me)), 25.65 (C(CH<sub>3</sub>)<sub>2</sub>), 25.41 (CHCH<sub>2</sub>), 19.47 (CH(CH<sub>3</sub>)), 17.57 (C(CH<sub>3</sub>)<sub>2</sub>); MS (ES<sup>+</sup>) 228.19 (M + H), 250.20 (M + Na).

### Synthesis of compound **6**

To a mixture of compound **5** (880 mg, 3.87 mmol) and triethylamine (500 mg, 4.95 mmol) in CH<sub>2</sub>Cl<sub>2</sub> (50 mL) was added ethyl malonyl chloride (640 mg, 4.26 mmol) and stirred at room temperature for 1 hour. The mixture was filtered, concentrated in vacuo, and flash column chromatography gave compound **6** (840 mg, 64% yield) as an oil. <sup>1</sup>H NMR (400 MHz, CDCl<sub>3</sub>, mixture of rotamers, a; major, b; minor) 5.07 (t, 1H, *J* = 6.8 Hz, CH), 4.24-4.16 (m, 2H, OCH<sub>2</sub>CH<sub>3</sub>), 4.08 (s, 2H, NCH<sub>2</sub>CO a), 4.06 (s, 2H, NCH<sub>2</sub>CO b), 3.78 (s, 3H, OCH<sub>3</sub> b), 3.73 (s, 3H, OCH<sub>3</sub> a), 3.49 (s, 2H, COCH<sub>2</sub>CO a), 3.38 (s, 2H, COCH<sub>2</sub>CO b), 3.44-3.26 (m, 2H NCH<sub>2</sub>CH<sub>2</sub>), 2.04-1.89 (m, 2H, CHCH<sub>2</sub>), 1.68 (s, 3H, C(CH<sub>3</sub>)<sub>2</sub>), 1.60 (s, 3H, C(CH<sub>3</sub>)<sub>2</sub>), 1.56-1.13 (m, 7H, CH<sub>2</sub>CH(CH<sub>3</sub>)CH<sub>2</sub> and OCH<sub>2</sub>CH<sub>3</sub>), 0.92-0.89 (m, 3H, CH(CH<sub>3</sub>)); <sup>13</sup>C NMR (100 MHz, CDCl<sub>3</sub>, mixture of rotamers, a; major, b; minor) 169.53 (ester C=O b), 169.39 (ester C=O a), 167.37 (ester C=O b), 167.24 (ester C=O a), 166.34 (amide C=O b), 166.03 (amide C=O a), 131.65 (CH=C(Me)<sub>2</sub>), 124.58 (CH=C(Me)<sub>2</sub> b), 124.14 (CH=C(Me)<sub>2</sub> a), 61.48 (OCH<sub>2</sub>CH<sub>3</sub>), 52.53 (OCH<sub>3</sub> b), 52.13 (OCH<sub>3</sub> a), 49.85 (NCH<sub>2</sub>C=O), 48.01 (CH<sub>2</sub>), 47.39 (CH<sub>2</sub>), 45.88 (CH<sub>2</sub>), 41.49 (CH<sub>2</sub>), 40.82 (CH<sub>2</sub>), 36.89 (CH<sub>2</sub>), 36.76 (CH<sub>2</sub>), 35.40 (CH<sub>2</sub>), 33.95 (CH<sub>2</sub>), 30.34 (CH(CH<sub>3</sub>) b), 30.24 (CH(CH<sub>3</sub>) a), 25.67 (C(CH<sub>3</sub>)<sub>2</sub>), 25.31 (CH<sub>2</sub>CH<sub>2</sub>CH), 19.34 (CH(CH<sub>3</sub>)), 17.61 (C(CH<sub>3</sub>)<sub>2</sub>), 14.07 (OCH<sub>2</sub>CH<sub>3</sub>); MS (ES<sup>+</sup>) 342.25 (M + H), 364.19 (M + Na).

### Synthesis of compound **7**

To the solution of compound **6** (830 mg, 2.53 mmol) in THF (20 ml) was added potassium *tert*-butoxide (310 mg, 2.79 mmol) and the mixture was heated under reflux for 3 hours. After the completion of the reaction, the mixture was cooled to room temperature and 1 N HCl (50 mL) was added. The mixture was extracted with

dichloromethane (50 mL x 3 times). The organic layer was dried over MgSO<sub>4</sub> and concentrated in vacuo. The residue was purified by flash column chromatography to afford pure compound **7** (405 mg, 1.31 mmol, 52% yield) as a solid (mp 91 °C). <sup>1</sup>H NMR (400 MHz, CDCl<sub>3</sub>) 5.06 (t, 1H, *J* = 6.4 Hz, CH=C), 4.37 (q, 2H, *J* = 6.8 Hz, OCH<sub>2</sub>CH<sub>3</sub>), 3.94 (s, 2H, C5), 3.52-3.33 (m, 2H, NCH<sub>2</sub>), 2.00-1.88 (m, 2H, CHCH<sub>2</sub>), 1.66 (s, 3H, C(CH<sub>3</sub>)<sub>2</sub>), 1.59 (s, 3H, C(CH<sub>3</sub>)<sub>2</sub>), 1.56-1.14 (m, 8H, CH<sub>2</sub>CH(CH<sub>3</sub>)CH<sub>2</sub> and OCH<sub>2</sub>CH<sub>3</sub>), 0.93 (d, 3H, *J* = 6.0 Hz, CH(CH<sub>3</sub>)); <sup>13</sup>C NMR (100 MHz, CDCl<sub>3</sub>); 183.42 (C4), 167.42 (C2), 165.85 (ester C=O), 131.33 (CH=C(Me)<sub>2</sub>), 124.49 (CH=C(Me)<sub>2</sub>), 99.83 (C3), 61.28 (OCH<sub>2</sub>CH<sub>3</sub>), 48.87 (C5), 39.43 (NCH<sub>2</sub>), 36.89 (CH(Me)CH<sub>2</sub>CH<sub>2</sub>CH), 35.08 (NCH<sub>2</sub>CH<sub>2</sub>), 29.95 (CH(Me)), 25.63 (C(CH<sub>3</sub>)<sub>2</sub>), 25.27 (C=CHCH<sub>2</sub>), 19.29 (CH(CH<sub>3</sub>)), 17.60 (C(CH<sub>3</sub>)<sub>2</sub>), 14.13 (OCH<sub>2</sub>CH<sub>3</sub>); MS (ES<sup>-</sup>); 308.21 (M - H); HRMS (M - H) calcd for C<sub>17</sub>H<sub>26</sub>N<sub>1</sub>O<sub>4</sub>, 308.1867; found, 308.1866.

#### Synthesis of 1-acetyl-5-(2-(methylthio)ethyl)pyrrolidine-2,4-dione (**8a**)

To a solution of *N*-acetyl-L-methionine (5.00 g, 26.1 mmol) in dichloromethane (150 mL) was added Meldrum's acid (1.1 equiv), DMAP (1.2 equiv) and DCC (1.2 equiv), and stirred overnight at room temperature. The mixture was filtered and the solution was washed with 5% aqueous KHSO<sub>4</sub> and saturated NaCl. The organic layer was evaporated to give a solid mass. The residue was dissolved in acetone and filtered for removing impurity and the solution was evaporated. The intermediate was obtained as a solid from precipitation in ethyl acetate and petrol solution. Then the solid was dissolved in ethyl acetate, and heated under reflux for 2 hours. After completion of the reaction, the solution was evaporated to give compound **6a** (5.0 g, 26.1 mmol, 31% yield) as a white solid (mp 95 °C). <sup>1</sup>H NMR (500 MHz, CDCl<sub>3</sub>, enol:keto = 35:65) 5.06 (s, 1H, C3 enol), 4.69 (dd, 1H, *J*<sub>1</sub> = 6.0 Hz, *J*<sub>2</sub> = 3.0 Hz, C5 enol),

4.50 (d, 1H,  $J = 7.0$  Hz, C5 keto), 3.52 (dd, 1H,  $J_1 = 22.5$  Hz,  $J_2 = 2.0$  Hz, C3 keto), 3.25 (d, 1H,  $J = 22$  Hz, C3 keto), 2.60 (s, 3H, C7 keto), 2.55-2.20 (m, 4H, C8 and C9), 2.51 (s, 3H, C7 enol), 2.07 (s, 3H, C10 enol), 1.91 (s, 3H, C10 keto);  $^{13}\text{C}$  NMR (125 MHz,  $\text{CDCl}_3$ ) 202.5 (C4 keto), 178.5 (C4 enol), 172.1 (C2 enol), 170.8 (C2 keto), 170.4 (C6 enol), 170.0 (C6 keto), 94.9 (C3 enol), 65.5 (C5 enol), 59.1 (C5 keto), 43.2 (C3 keto), 28.8 (C9 keto), 28.4 (C9 enol), 28.3 (C8 enol), 27.3 (C8 keto), 26.1 (C7 enol), 25.1 (C7 keto), 15.3 (C10 enol), 14.5 (C10 keto); MS ( $\text{ES}^-$ ) 214.04; HRMS ( $\text{M} - \text{H}$ ) calcd for  $\text{C}_9\text{H}_{12}\text{N}_1\text{O}_3\text{S}_1$ ; 214.0543; found; 214.0547.

#### Synthesis of 1-(cyclohexanecarbonyl)-5-(2-(methylthio)ethyl)pyrrolidine-2,4-dione (**8b**)

Compound **8b** was prepared by using the same method as for compound **3a**. Yield; 49%; mp 121 °C;  $^1\text{H}$  NMR (400 MHz,  $\text{CDCl}_3$ , enol: keto form = 20: 80) 5.03 (s, 1H, C3 enol), 4.67 (dd, 1H,  $J_1 = 6.0$  Hz,  $J_2 = 2.8$  Hz, C5 enol), 4.52 (d, 1H,  $J = 6.8$  Hz, C5 keto), 3.55-3.48 (m, 2H keto and 1H enol, C3 and C10 keto, and C10 enol), 3.25 (d, 1H,  $J = 22$  Hz, C3 keto), 2.53-2.15 (m, 4H, C6 and C7), 2.08 (s, 3H, C8 enol), 1.90 (s, 3H, C8 keto), 2.01-1.09 (m, 10H, C11-C15);  $^1\text{H}$  NMR (400 MHz, MeOD, only enol form) 4.88 (brs, 2H, C3 and OH), 4.69-4.677 (m, 1H, C5), 3.59-3.51 (m, 1H, C10), 2.38-2.08 (m, 4H, C6 and C7), 2.04 (s, 3H, C8), 1.94-1.20 (m, 10H, C11-C15);  $^{13}\text{C}$  NMR (100 MHz, MeOD, only enol form); 180.1 (C4), 177.9 (amide carbonyl), 173.3 (amide carbonyl), 66.3 (C5), 45.1 (C10), 31.4 ( $\text{CH}_2$ ), 29.7 ( $\text{CH}_2$ ), 29.5 ( $\text{CH}_2$ ), 28.6 ( $\text{CH}_2$ ), 27.2 ( $\text{CH}_2$ ), 27.2 ( $\text{CH}_2$ ), 26.8 ( $\text{CH}_2$ ), 15.5 (C8); MS ( $\text{ES}^-$ ) 282.11 ( $\text{M} - \text{H}$ ); HRMS ( $\text{M} - \text{H}$ ) calcd for  $\text{C}_{14}\text{H}_{20}\text{N}_1\text{O}_3\text{S}_1$ , 282.1169; found, 282.1171.

### Synthesis of **9a**

To a solution of tetramic acid **8a** (3.0 g, 13.9 mmol) and DMAP (3.7 g, 30.7 mmol) in dichloromethane (100 mL) was slowly added butyl chloroformate (250 mg, 1.78 mmol) under nitrogen atmosphere at 0 °C, and the mixture stirred overnight at room temperature under nitrogen atmosphere. After completion of the reaction, the mixture was washed with 2 M HCl (50 mL x 2 times). The organic layer was dried over MgSO<sub>4</sub> and evaporated in vacuo. The residue was purified by flash column chromatography to give tetramic acid **9a** (4.11 g, 13.1 mmol, 94% yield) as an oil. <sup>1</sup>H NMR (400 MHz, CDCl<sub>3</sub>) 4.81 (t, 1H, *J* = 4.0 Hz, C5), 4.28 (t, 2H, *J* = 6.8 Hz, OCH<sub>2</sub>), 2.46 (s, 3H, COCH<sub>3</sub>), 2.44-2.26 (m, 4H, SCH<sub>2</sub>CH<sub>2</sub>), 2.02 (s, 3H, SCH<sub>3</sub>), 1.73-1.65 (m, 2H, OCH<sub>2</sub>CH<sub>2</sub>), 1.44-1.34 (m, 2H, O(CH<sub>2</sub>)<sub>2</sub>CH<sub>2</sub>), 0.90 (t, 3H, *J* = 7.6 Hz, O(CH<sub>2</sub>)<sub>3</sub>CH<sub>3</sub>); <sup>13</sup>C NMR (100 MHz, CDCl<sub>3</sub>) 188.2 (C4), 169.8 (NC=OMe), 166.8 (ester C=O), 164.1 (C2), 98.4 (C3), 65.4 (OCH<sub>2</sub>), 56.9 (C5), 30.2 (OCH<sub>2</sub>CH<sub>2</sub>), 28.4 (SCH<sub>2</sub>), 27.8 (SCH<sub>2</sub>CH<sub>2</sub>), 25.2 (NC=OCH<sub>3</sub>), 18.8 (O(CH<sub>2</sub>)<sub>2</sub>CH<sub>2</sub>), 15.1 (SCH<sub>3</sub>), 13.5 (O(CH<sub>2</sub>)<sub>3</sub>CH<sub>3</sub>); MS (ES<sup>-</sup>) 314.12 (M - H); HRMS (M - H), calcd for C<sub>14</sub>H<sub>20</sub>N<sub>1</sub>O<sub>5</sub>S<sub>1</sub>, 314.1068; found, 314.1069.

### Synthesis of **9b**

Tetramic acid **9b** was obtained from tetramic acid **8b** by using the same method as for tetramic acid **9a**; Yield 92%; mp 80 °C; <sup>1</sup>H NMR (400 MHz, CDCl<sub>3</sub>) 4.87-4.85 (m, 1H, C5), 4.39-4.28 (m, 2H, OCH<sub>2</sub>), 2.43-2.30 (m, 3H), 2.06 (s, 3H, SCH<sub>3</sub>), 1.82-1.65 (m, 7H), 1.51-1.18 (m, 9H), 0.94 (t, 3H, *J* = 8.0 Hz, O(CH<sub>2</sub>)<sub>3</sub>CH<sub>3</sub>); <sup>13</sup>C NMR (100 MHz, CDCl<sub>3</sub>); 188.5 (C4), 176.5 (NC=OCH), 167.1 (ester C=O), 163.9 (C2), 98.6 (C3), 65.6 (OCH<sub>2</sub>), 57.0 (C5), 44.0 (NC=OCH), 30.4 (CH<sub>2</sub>), 30.1 (CH<sub>2</sub>), 28.6 (CH<sub>2</sub>), 27.9 (CH<sub>2</sub>), 27.8 (CH<sub>2</sub>), 25.8 (CH<sub>2</sub>), 25.2 (CH<sub>2</sub>), 18.9 (CH<sub>2</sub>), 15.3 (SCH<sub>3</sub>), 13.6

(O(CH<sub>2</sub>)<sub>3</sub>CH<sub>3</sub>). MS (ES<sup>-</sup>); 382.17 (M - H); HRMS (M - H), calcd for C<sub>19</sub>H<sub>28</sub>N<sub>1</sub>O<sub>5</sub>S<sub>1</sub>, 382.1694; found, 382.1698.

### Synthesis of 3-carboxamide tetramic acids **2** and **3**

**General method:** To a solution of 3-alkoxycarbonyl tetramic acid (1.0 equiv) in toluene was added primary amine (1.0 equiv), and the mixture was heated under reflux for 4 hours. After completion of the reaction as indicated by TLC, the solvent was evaporated, and column chromatography gave metal-chelated 3-carboxamide tetramic acid. The compound was dissolved in dichloromethane (50 mL) and washed with 1 N HCl (20 mL). The organic layer was dried with MgSO<sub>4</sub> and concentrated in vacuo to give pure 3-carboxamide tetramic acid.

### Synthesis of **2a**

Yield 66%; mp 97 °C; Form AB:CD = 90:10; <sup>1</sup>H NMR (400 MHz, CDCl<sub>3</sub>) 9.81 (brs, 1H, NH or OH), 9.55 (brs, 1H, NH or OH AB), 9.25 (brs, 1H, NH or OH AB), 7.51 (d, 2H, *J* = 8.8 Hz, C14 and C15 AB), 7.39 (d, 2H, *J* = 8.8 Hz, C14 and C15 CD), 6.91 (d, 2H, *J* = 8.8 Hz, C16 and C17), 3.98 (s, 2H, C5 AB), 3.87 (t, 4H, *J* = 4.8 Hz, C21 and C22), 3.77 (s, 2H, C5 CD), 3.43 (t, 2H, *J* = 7.2 Hz, C6), 3.13 (t, 4H, *J* = 4.8 Hz, C19 and C20), 1.59-1.54 (m, 2H, C7), 1.34-1.25 (m, 6H, C8-10), 0.89 (t, 3H, *J* = 6.8 Hz, C11); <sup>13</sup>C NMR (100 MHz, CDCl<sub>3</sub>, only AB tautomer) 180.5 (C4), 168.8 (C2), 163.7 (C12), 148.2 (C18), 129.7 (C13), 121.4 (C14 and C15), 116.3 (C16 and C17), 99.6 (C3), 66.7 (C21 and C22), 49.7 (C5), 49.5 (C19 and C20), 41.4 (C6), 31.4 (CH<sub>2</sub>), 28.4 (CH<sub>2</sub>), 26.4 (CH<sub>2</sub>), 22.5 (CH<sub>2</sub>), 14.0 (C11); MS (ES<sup>-</sup>) 386.22; HRMS (M - H) calcd for C<sub>21</sub>H<sub>28</sub>N<sub>3</sub>O<sub>4</sub>, 386.2085; found, 386.2092.

### Synthesis of **2b**

Yield 90%; mp 67 °C; Form AB:CD = 90:10; <sup>1</sup>H NMR (500 MHz, CDCl<sub>3</sub>) 11.10 (s, 1H, NH), 9.70 (s, 1H, OH AB), 9.30 (s, 1H, OH CD), 7.61 (d, 2H, *J* = 8.0 Hz, C14 and C15 AB), 7.51 (d, 2H, *J* = 7.6 Hz, C14 and C15 CD), 7.34 (dd, 2H, *J*<sub>1</sub> = 8.0 Hz, *J*<sub>2</sub> = 7.6 Hz, C16 and C17), 7.34 (dd, 1H, *J*<sub>1</sub> = 7.6 Hz, *J*<sub>2</sub> = 7.6 Hz, C18), 3.97 (s, 2H, C5 AB), 3.79 (s, 2H, C5 CD), 3.43 (t, 2H, *J* = 7.2 Hz, C6), 1.58-1.53 (m, 2H, C7), 1.36-1.26 (m, 6H, C8-10), 0.89 (t, 3H, *J* = 6.8 Hz, C11); <sup>13</sup>C NMR (125 MHz, CDCl<sub>3</sub>); 188.8 (C4 CD), 180.6 (C4 AB), 175.8 (C2 CD), 168.6 (C2 AB), 165.2 (C12 CD), 164.0 (C12 AB), 136.9 (C13 AB), 136.3 (C13 CD), 129.0 (C16 and C17 CD), 128.9 (C16 and C17 AB), 124.7 (C18 CD), 124.4 (C18 AB), 120.5 (C14 and C15 CD), 120.0 (C14 and C15 AB), 99.7 (C3 AB), 87.2 (C3 CD), 55.4 (C5 CD), 49.4 (C5 AB), 42.2 (C6 CD), 41.3 (C6 AB), 31.3 (C9 AB), 31.2 (C9 CD), 28.3 (C7 AB), 27.9 (C7 CD), 26.3 (C8 AB), 26.2 (C8 CD), 22.4 (C10), 13.9 (C11); MS (ES<sup>-</sup>) 301.1; HRMS (M + H), calcd for C<sub>17</sub>H<sub>23</sub>N<sub>2</sub>O<sub>3</sub>, 303.1703; found, 303.1700.

### Synthesis of **2c**

Yield 88% (oil); Form AB:CD = 80:20; <sup>1</sup>H NMR (400 MHz, CDCl<sub>3</sub>) 8.88 (brs, 1H, OH), 7.65 (brs, 1H, NH), 3.90 (s, 2H, C5 AB), 3.85-3.81 (m, 1H, C13), 3.67 (s, 2H, C5 CD), 3.38 (t, 2H, *J* = 7.2 Hz, C6), 1.91-1.88 (m, 2H, CH<sub>2</sub>), 1.74-1.71 (m, 2H, CH<sub>2</sub>), 1.60-1.52 (m, 3H, CH<sub>2</sub>), 1.42-1.17 (m, 11H, CH<sub>2</sub>), 0.88 (t, 3H, *J* = 6.4 Hz, C11); <sup>13</sup>C NMR (125 MHz, CDCl<sub>3</sub>); 189.8 (C4 CD), 181.4 (C4 AB), 175.2 (C2 CD), 169.1 (C2 AB), 165.7 (C12 CD), 165.1 (C12 AB), 98.4 (C3 AB), 85.4 (C3 CD), 55.0 (C5 CD), 49.8 (C5 AB), 48.9 (C13 CD), 47.3 (C13 AB), 41.5 (C6 CD), 41.3 (C6 AB), 32.8 (CH<sub>2</sub>), 32.7 (CH<sub>2</sub>), 31.4 (CH<sub>2</sub>), 29.6 (CH<sub>2</sub>), 28.4 (CH<sub>2</sub>), 28.0 (CH<sub>2</sub>), 26.4 (CH<sub>2</sub>), 26.3



(CH<sub>2</sub>), 25.4 (CH<sub>2</sub>), 25.1 (CH<sub>2</sub>), 24.5 (CH<sub>2</sub>), 22.5 (CH<sub>2</sub>), 13.9 (C11); MS (ES<sup>-</sup>) 307.2 (M - H); HRMS (M + Na), calcd for C<sub>17</sub>H<sub>28</sub>N<sub>2</sub>Na<sub>1</sub>O<sub>3</sub>, 331.1992; found, 331.1993.

#### Synthesis of compound **2d**

Yield 41% (oil); Form AB:CD = 80:20; <sup>1</sup>H NMR (400 MHz, CDCl<sub>3</sub>) 9.14 (brs, 1H, OH), 7.70 (brs, 1H, NH), 3.90 (s, 2H, C5 AB), 3.68 (s, 2H, C5 CD), 3.39-3.16 (m, 4H, C6 and C13), 1.56-1.51 (m, 4H, C7 and C14), 1.37-1.28 (m, 12H, C8-10 and C15-17), 0.87 (t, 6H, *J* = 6.8 Hz, C11 and C18); <sup>13</sup>C NMR (125 MHz, CDCl<sub>3</sub>) 189.8 (C4 CD), 181.1 (C4 AB), 175.2 (C2 CD), 169.1 (C2 AB), 166.6 (C12 AB), 166.0 (C12 AB), 98.6 (C3 AB), 85.6 (C3 CD), 55.0 (C5 CD), 49.7 (C5 AB), 41.5 (CH<sub>2</sub>), 41.2 (CH<sub>2</sub>), 39.6 (CH<sub>2</sub>), 38.4 (CH<sub>2</sub>), 31.4 (CH<sub>2</sub>), 31.3 (CH<sub>2</sub>), 29.4 (CH<sub>2</sub>), 28.4 (CH<sub>2</sub>), 28.0 (CH<sub>2</sub>), 26.5 (CH<sub>2</sub>), 26.4 (CH<sub>2</sub>), 22.5 (CH<sub>2</sub>), 13.9 (C11 and C18); MS (ES<sup>-</sup>) 309.2; HRMS (M - H), calcd for C<sub>17</sub>H<sub>29</sub>N<sub>2</sub>O<sub>3</sub>, 309.2184; found, 309.2178.

#### Synthesis of **2e**

Yield 58% (oil); Form AB:CD = 80:20; <sup>1</sup>H NMR (400 MHz, CDCl<sub>3</sub>) 9.44 (brs, 1H, OH), 7.70 (brs, 1H, NH), 3.91 (s, 2H, C5 AB), 3.68 (s, 2H, C5 CD), 3.40-3.30 (m, 4H, C6 and C13), 1.59-1.52 (m, 4H, C7 and C14), 1.35-1.25 (m, 18H, C8-10 and C15-20), 0.89-0.85 (m, 6H, C11 and C21); <sup>13</sup>C NMR (100 MHz, CDCl<sub>3</sub>, Only AB tautomer) 181.1 (C4), 169.1 (C2), 166.0 (C12), 98.6 (C3), 49.7 (C5), 41.3 (CH<sub>2</sub>), 38.4 (CH<sub>2</sub>), 31.8 (CH<sub>2</sub>), 31.4 (CH<sub>2</sub>), 29.4 (CH<sub>2</sub>), 29.4 (CH<sub>2</sub>), 29.2 (CH<sub>2</sub>), 29.2 (CH<sub>2</sub>), 28.4 (CH<sub>2</sub>), 26.8 (CH<sub>2</sub>), 26.4 (CH<sub>2</sub>), 22.6 (CH<sub>2</sub>), 22.5 (CH<sub>2</sub>), 14.1 (CH<sub>3</sub>), 14.0 (CH<sub>3</sub>); MS (ES<sup>-</sup>) 351.3; HRMS (M - H) calcd for C<sub>20</sub>H<sub>35</sub>N<sub>2</sub>O<sub>3</sub>, 351.2653; found, 351.2657.

### Synthesis of **2f**

Yield, 55% (oil); Form AB:CD = 80:20;  $^1\text{H}$  NMR (400 MHz,  $\text{CDCl}_3$ ) 7.71 (brs, 1H, NH), 3.91 (s, 2H, C5 AB), 3.69 (s, 2H, C5 CD), 3.41-3.31 (m, 4H,  $\text{NCH}_2$  and  $\text{NHCH}_2$ ), 1.56-1.54 (m, 4H,  $\text{NCH}_2\text{CH}_2$  and  $\text{NHCH}_2\text{CH}_2\text{C7}$ ), 1.30-1.25 (m, 24H,  $\text{CH}_2$ ), 0.90-0.86 (m, 6H,  $\text{CH}_3$ );  $^{13}\text{C}$  NMR (100 MHz,  $\text{CDCl}_3$ , AB tautomer only) 181.09 (C4), 169.09 (C2), 165.98 ( $\text{C}=\text{ONH}$ ), 98.64 (C3), 49.75 (C5), 41.28 ( $\text{CH}_2$ ), 38.41 ( $\text{CH}_2$ ), 31.88 ( $\text{CH}_2$ ), 31.42 ( $\text{CH}_2$ ), 29.58 ( $\text{CH}_2$ ), 29.47 ( $\text{CH}_2$ ), 29.31 ( $\text{CH}_2$ ), 29.23 ( $\text{CH}_2$ ), 28.40 ( $\text{CH}_2$ ), 26.85 ( $\text{CH}_2$ ), 26.38 ( $\text{CH}_2$ ), 22.65 ( $\text{CH}_2$ ), 22.49 ( $\text{CH}_2$ ), 14.08 ( $\text{CH}_3$ ), 13.97 ( $\text{CH}_3$ ); MS ( $\text{ES}^-$ ) 393.3; HRMS (M - H) calcd for  $\text{C}_{23}\text{H}_{41}\text{N}_2\text{O}_3$ , 393.3123; found, 393.3120.

### Synthesis of **2g**

Yield 54%; mp 84 °C; Form AB:CD = 90:10;  $^1\text{H}$  NMR (400 MHz,  $\text{CDCl}_3$ ) 9.03 (brs, 1H, OH), 8.09 (brs, 1H, NH), 7.36-7.25 (m, 5H, Ar-H), 4.55 (d, 2H,  $J = 6.0$  Hz,  $\text{NHCH}_2$ ), 3.94 (s, 2H, C5 AB), 3.70 (s, 2H, C5 CD), 3.39 (t, 2H,  $J = 7.6$  Hz,  $\text{NCH}_2$ ), 1.56-1.53 (m, 2H,  $\text{NCH}_2\text{CH}_2$ ), 1.37-1.26 (m, 6H,  $\text{CH}_2$ ), 0.89 (t, 3H,  $J = 6.4$  Hz,  $\text{CH}_3$ );  $^{13}\text{C}$  NMR (100 MHz,  $\text{CDCl}_3$ ); 189.55 (C4 CD), 180.70 (C4 AB), 175.49 (C2 CD), 168.83 (C2 AB), 166.67 ( $\text{C}=\text{ONH}$  CD), 165.89 ( $\text{C}=\text{ONH}$  AB), 137.52 (Ar quart-C AB), 136.67 (Ar quart-C CD), 128.80 (Ar tert-C CD), 128.67 (Ar tert-C AB), 127.85 (Ar tert-C CD), 127.53 (Ar tert-C AB), 127.47 (Ar tert-C AB), 126.87 (Ar tert-C CD), 99.17 (C3 AB), 85.95 (C3 CD), 55.22 (C5 CD), 49.57 (C5 AB), 43.21 ( $\text{NHCH}_2$  CD), 42.23 ( $\text{NHCH}_2$  AB), 41.76 ( $\text{NCH}_2$  CD), 41.25 ( $\text{NCH}_2$  AB), 31.38 ( $\text{CH}_2$ ), 28.37 ( $\text{CH}_2$ ), 26.35 ( $\text{CH}_2$ ), 22.47 ( $\text{CH}_2$ ), 13.96 ( $\text{CH}_3$ ); MS ( $\text{ES}^-$ ) 315.2; HRMS (M + Na) calcd for  $\text{C}_{18}\text{H}_{24}\text{N}_2\text{Na}_1\text{O}_3$ , 339.1679; found, 339.1674.

### Synthesis of **2h**

Yield 60%; mp 96 °C; Form AB:CD = 90:10;  $^1\text{H}$  NMR (400 MHz,  $\text{CDCl}_3$ ) 9.55 (brs, 1H, NH or OH AB), 9.25 (brs, 1H, NH or OH CD), 8.27 (brs, 1H, NH or OH), 7.50 (d, 2H,  $J = 8.8$  Hz, Ar-H AB), 7.38 (d, 2H,  $J = 8.8$  Hz, Ar-H CD), 6.89 (d, 2H,  $J = 8.8$  Hz, Ar-H), 5.08 (t, 1H,  $J = 6.8$  Hz,  $\text{CH}=\text{C}$ ), 3.96 (s, 2H, C5 AB), 3.86 (t, 4H,  $J = 4.8$  Hz,  $\text{CH}_2\text{OCH}_2$ ), 3.76 (s, 2H, C5 CD), 3.54-3.39 (m, 2H,  $\text{NCH}_2$ ), 3.13 (t, 4H,  $J = 4.8$  Hz,  $\text{CH}_2\text{NCH}_2$ ), 2.07-1.91 (m, 2H,  $\text{CHCH}_2$ ), 1.68 (s, 3H,  $\text{C}(\text{CH}_3)_2$ ), 1.60 (s, 3H,  $\text{C}(\text{CH}_3)_2$ ), 1.64-1.17 (m, 5H,  $\text{CH}_2\text{CH}(\text{Me})\text{CH}_2$ ), 0.96 (d, 3H,  $J = 6.4$  Hz,  $\text{CH}(\text{CH}_3)$ );  $^{13}\text{C}$  NMR (100 MHz,  $\text{CDCl}_3$ , AB tautomer only) 180.52 (C4), 168.73 (C2), 163.67 ( $\text{C}=\text{ONH}$ ), 148.29 (Ar quart-C), 131.44 ( $\text{CH}=\text{C}(\text{Me})_2$ ), 129.56 (Ar quart-C), 124.39 ( $\text{CH}=\text{C}(\text{Me})_2$ ), 121.36 (Ar tert-C), 116.17 (Ar tert-C), 99.63 (C3), 66.78 ( $\text{CH}_2\text{OCH}_2$ ), 49.56 (C5), 49.45 ( $\text{CH}_2\text{NCH}_2$ ), 39.43 ( $\text{NCH}_2$ ), 36.81 ( $\text{NCH}_2\text{CH}_2\text{CH}(\text{Me})\text{CH}_2$ ), 35.23 ( $\text{NCH}_2\text{CH}_2$ ), 29.98 ( $\text{CH}_2\text{CH}(\text{Me})\text{CH}_2$ ), 25.64 ( $\text{C}(\text{CH}_3)_2$ ), 25.29 ( $\text{CHCH}_2$ ), 19.27 ( $\text{CH}(\text{CH}_3)$ ), 17.62 ( $\text{C}(\text{CH}_3)_2$ ); MS ( $\text{ES}^-$ ) 440.29 (M - H); HRMS (M - H) calcd for  $\text{C}_{25}\text{H}_{34}\text{N}_3\text{O}_4$ , 440.2555; found, 440.2553.

### Synthesis of **3a**

Yield 45% (oil); AB:CD = 85:15;  $^1\text{H}$  NMR (400 MHz,  $\text{CDCl}_3$ ) 11.85 (brs, 1H, OH), 8.60 (brs, 1H, NH CD), 8.04 (brs, 1H, NH AB), 4.73 (t, 1H,  $J = 4.0$  Hz, C5 AB), 4.41 (brs, 1H, C5 CD), 3.63-3.43 (m, 6H, cy-Hx  $\text{CH}$ ,  $\text{NHCH}_2$ ,  $\text{OCH}_2$  and  $\text{OCH}$ ), 2.46-2.34 (m, 2H,  $\text{SCH}_2$ ), 2.28-2.21 (m, 2H,  $\text{SCH}_2\text{CH}_2$ ), 2.04 (s, 3H,  $\text{SCH}_3$ ), 1.93-1.65 (m, 7H,  $\text{NHCH}_2\text{CH}_2$  and cy-Hx  $\text{CH}_2$ ), 1.49-1.22 (m, 5H, cy-Hx  $\text{CH}_2$ ), 1.18 (d, 6H,  $J = 6.0$  Hz,  $\text{CH}(\text{CH}_3)_2$ ).  $^{13}\text{C}$  NMR (100 MHz,  $\text{CDCl}_3$ , AB tautomer only); 189.4 (C4), 176.0 ( $\text{NC}=\text{O}$ ), 167.3 (C2), 166.0 ( $\text{C}=\text{ONH}$ ), 95.4 (C3), 72.0 ( $\text{OCH}$ ), 66.6 ( $\text{OCH}_2$ ), 58.6 (C5), 44.1 (cy-Hx  $\text{CH}$ ), 37.7 ( $\text{NHCH}_2$ ), 30.0 ( $\text{CH}_2$ ), 29.0 ( $\text{CH}_2$ ), 28.5 ( $\text{CH}_2$ ), 28.0

(CH<sub>2</sub>), 27.9 (CH<sub>2</sub>), 25.8 (CH<sub>2</sub>), 25.7 (CH<sub>2</sub>), 25.4 (CH<sub>2</sub>), 21.8 (CH(CH<sub>3</sub>)<sub>2</sub>), 15.2 (SCH<sub>3</sub>); MS (ES<sup>-</sup>) 425.21 (M - H); HRMS (M - H) calcd for C<sub>21</sub>H<sub>33</sub>N<sub>2</sub>O<sub>5</sub>S<sub>1</sub>, 425.2116; found, 425.2118.

### Synthesis of **3b**

Yield 52%; mp 97 °C; AB:CD = 85:15; <sup>1</sup>H NMR (400 MHz, CDCl<sub>3</sub>) 11.96 (brs, 1H, OH), 8.31 (d, 1H, *J* = 8.0 Hz, NH CD), 7.46 (d, 1H, *J* = 8.0 Hz, NH AB), 4.75 (t, 1H, *J* = 5.2 Hz, C5 AB), 4.44 (t, 1H, *J* = 5.2 Hz, C5 CD), 3.88-3.80 (m, 1H, NHCH), 3.49-3.44 (m, 1H, cy-Hx CH), 2.47-2.36 (m, 2H, SCH<sub>2</sub>), 2.29-2.20 (m, 2H, SCH<sub>2</sub>CH<sub>2</sub>), 2.05 (s, 3H, SCH<sub>3</sub> AB), 2.04 (s, 3H, SCH<sub>3</sub> CD), 1.94-1.60 (m, 10H, CH<sub>2</sub>), 1.50-1.23 (m, 10H, CH<sub>2</sub>); <sup>13</sup>C NMR (100 MHz, CDCl<sub>3</sub>); 192.0 (C4 CD), 189.6 (C4 AB), 176.0 (NC=O AB), 175.7 (NC=O CD), 173.9 (C2 CD), 167.7 (C2 AB), 165.9 (C=ONH CD), 165.4 (C=ONH AB), 95.3 (C3 AB), 86.1 (C3 CD), 62.6 (C5 CD), 58.8 (C5 AB), 49.6 (NHCH CD), 48.1 (NHCH AB), 44.4 (cy-Hx CH CD), 44.1 (cy-Hx CH AB), 32.7 (CH<sub>2</sub> AB), 32.6 (CH<sub>2</sub> AB), 32.4 (CH<sub>2</sub> CD), 30.2 (CH<sub>2</sub> CD), 30.1 (CH<sub>2</sub> AB), 29.6 (CH<sub>2</sub> CD), 28.9 (CH<sub>2</sub> CD), 28.6 (CH<sub>2</sub> AB), 28.3 (CH<sub>2</sub> CD), 28.1 (CH<sub>2</sub> CD), 28.0 (CH<sub>2</sub> AB), 27.9 (CH<sub>2</sub> AB), 25.8 (CH<sub>2</sub>), 25.7 (CH<sub>2</sub>), 25.4 (CH<sub>2</sub> CD), 25.3 (CH<sub>2</sub> AB), 25.2 (CH<sub>2</sub> AB), 24.9 (CH<sub>2</sub> CD), 24.5 (CH<sub>2</sub> AB), 24.2 (CH<sub>2</sub> CD), 15.2 (SCH<sub>3</sub>); MS (ES<sup>-</sup>) 407.20 (M - H); HRMS (M - H) calcd for C<sub>21</sub>H<sub>31</sub>N<sub>2</sub>O<sub>4</sub>S<sub>1</sub>, 407.2010; found, 407.2012.

### Synthesis of **3c**

Yield, 64%; mp 46 °C; AB:CD = 80:20; <sup>1</sup>H NMR (400 MHz, CDCl<sub>3</sub>) 11.86 (brs, 1H, NH or OH), 8.56 (brs, 1H, NH or OH CD), 7.59 (brs, 1H, NH or OH AB), 4.72 (dd, 1H, *J*<sub>1</sub> = 6.0 Hz, *J*<sub>2</sub> = 4.0 Hz, C5 AB), 4.44 (t, 1H, *J* = 4.4 Hz, C5 CD), 2.55 (s, 3H, C=OCH<sub>3</sub> CD), 2.53 (s, 3H, C=OCH<sub>3</sub> AB), 2.51-2.41 (m, 2H, SCH<sub>2</sub>), 2.38-2.25 (m, 2H,

SCH<sub>2</sub>CH<sub>2</sub>), 2.08 (s, 3H, SCH<sub>3</sub> AB), 2.06 (s, 3H, SCH<sub>3</sub> CD), 1.78 (s, 2H, CCH<sub>2</sub>C), 1.52 (s, 6H, NHC(CH<sub>3</sub>)<sub>2</sub> CD), 1.50 (s, 6H, NHC(CH<sub>3</sub>)<sub>2</sub> AB), 1.01 (s, 9H, C(CH<sub>3</sub>)<sub>3</sub>); <sup>13</sup>C NMR (100 MHz, CDCl<sub>3</sub>); 191.8 (C4 CD), 190.6 (C4 AB), 174.4 (NC=O CD), 169.6 (NC=O AB), 169.2 (C2 CD), 168.3 (C2 AB), 166.7 (C=ONH CD), 166.3 (C=ONH AB), 94.7 (C3 AB), 86.4 (C3 CD), 62.6 (C5 CD), 59.0 (C5 AB), 57.7 (NHC(Me)<sub>2</sub> CD), 56.4 (NHC(Me)<sub>2</sub> AB), 52.4 (CCH<sub>2</sub>C CD), 52.1 (CCH<sub>2</sub>C AB), 31.6 (C(Me)<sub>3</sub>), 31.3 (C(CH<sub>3</sub>)<sub>3</sub> AB), 31.2 (C(CH<sub>3</sub>)<sub>3</sub> CD), 29.3 (NHC(CH<sub>3</sub>)<sub>2</sub> CD), 29.2 (NHC(CH<sub>3</sub>)<sub>2</sub> AB), 28.7 (SCH<sub>2</sub> CD), 28.5 (SCH<sub>2</sub> AB), 28.4 (SCH<sub>2</sub>CH<sub>2</sub> CD), 28.2 (SCH<sub>2</sub>CH<sub>2</sub> AB), 25.5 (C=OCH<sub>3</sub> CD), 25.3 (C=OCH<sub>3</sub> AB), 15.3 (SCH<sub>3</sub>); MS (ES<sup>-</sup>) 369.19 (M-H); MS (ES<sup>+</sup>) 371.21 (M + H), 393.19 (M + Na); HRMS (M + Na) calcd for C<sub>18</sub>H<sub>30</sub>N<sub>2</sub>O<sub>4</sub>S<sub>1</sub>, 393.1818; found, 393.1805.

### Synthesis of **3d**

Yield 58%; mp 91 °C; AB:CD = 80:20; <sup>1</sup>H NMR (400 MHz, CDCl<sub>3</sub>) 11.15 (brs, 1H, OH), 7.87 (d, 1H, *J* = 6.4 Hz, NH AB), 7.34 (d, 1H, *J* = 6.4 Hz, NH CD), 4.76 (t, 1H, *J* = 5.2 Hz, C5 AB), 4.47-4.43 (m, 1H, C5 CD), 4.28-4.26 (m, 1H, NHCH AB), 4.09-3.98 (m, 1H, NHCH CD), 2.54 (s, 3H, C=OCH<sub>3</sub> CD), 2.52 (s, 3H, C=OCH<sub>3</sub> AB), 2.51-2.42 (m, 2H, SCH<sub>2</sub>), 2.38-2.26 (m, 2H, SCH<sub>2</sub>CH<sub>2</sub>), 2.09 (s, 3H, SCH<sub>3</sub> AB), 2.05 (s, 3H, SCH<sub>3</sub> CD), 2.00-1.17 (m, 6H, cy-Hx CH<sub>2</sub>), 1.08-0.93 (m, 9H, cy-Hx CH<sub>3</sub>); <sup>13</sup>C NMR (100 MHz, CDCl<sub>3</sub>, diastereo mixture, tautomer AB only); 189.9 and 189.8 (C4), 169.6 and 169.5 (NC=O), 168.2 and 168.1 (C2), 165.5 and 165.4 (C=ONH AB), 95.0 (C3), 58.9 and 58.8 (C5), 47.4 and 47.3 (CH<sub>2</sub>), 45.7 and 45.6 (NHCH), 41.6 and 41.5 (CH<sub>2</sub>), 38.3 and 38.2 (CH<sub>2</sub>), 33.8 (CH<sub>3</sub>), 30.6 (C(CH<sub>3</sub>)), 28.6 and 28.5 (SCH<sub>2</sub>), 28.2 and 28.1 (SCH<sub>2</sub>CH<sub>2</sub>), 27.8 (CH<sub>3</sub>), 25.4 and 25.3 (C=OCH<sub>3</sub>), 22.3 and 22.2 (CH<sub>3</sub>) 15.3

(SCH<sub>3</sub>); MS (ES<sup>-</sup>) 381.19 (M - H), MS (ES<sup>+</sup>), 383.20 (M + H); HRMS (M + Na) calcd for C<sub>19</sub>H<sub>30</sub>N<sub>2</sub>O<sub>4</sub>S<sub>1</sub>, 405.1818; found, 405.1814.

### Synthesis of **3e**

Yield 63%; mp 159 °C; AB:CD = 99:1; <sup>1</sup>H NMR (400 MHz, DMSO) 10.89 (s, 1H, NH or OH), 7.67 (d, 2H, *J* = 8.8 Hz, Ar-H), 7.43 (d, 2H, *J* = 8.8 Hz, Ar-H), 4.14 (dd, 1H, *J*<sub>1</sub> = 6.0 Hz, *J*<sub>2</sub> = 4.0 Hz, C5), 3.14 (s, 6H, N(CH<sub>3</sub>)<sub>2</sub>), 2.42 (s, 3H, C=OCH<sub>3</sub>), 2.38-2.31 (m, 2H, SCH<sub>2</sub>), 2.17-2.03 (m, 2H, SCH<sub>2</sub>CH<sub>2</sub>), 1.99 (s, 3H, SCH<sub>3</sub>); <sup>13</sup>C NMR (100 MHz, DMSO, tautomer AB only); 190.4 (C4), 170.5 (NC=O), 168.8 (C2), 162.7 (C=ONH), 138.8 (Ar quart-C), 125.3 (Ar quart-C), 120.0 (Ar tert-C), 119.5 (Ar tert-C), 92.9 (C3), 59.2 (C5), 45.4 (N(CH<sub>3</sub>)<sub>2</sub>), 29.0 (SCH<sub>2</sub>), 27.7 (SCH<sub>2</sub>CH<sub>2</sub>), 25.3 (C=OCH<sub>3</sub>), 14.7 (SCH<sub>3</sub>); MS (ES<sup>-</sup>), 376.14 (M - H); HRMS (M + Na), calcd for C<sub>18</sub>H<sub>23</sub>N<sub>3</sub>O<sub>4</sub>S<sub>1</sub>, 400.1301; found, 400.1290.

### Synthesis of **3f**

Yield 60%; mp 170 °C; AB:CD = 99:1; <sup>1</sup>H NMR (400 MHz, CDCl<sub>3</sub>) 9.21 (s, 1H, NH or OH), 8.18 (s, 1H, NH or OH), 7.48 (d, 2H, *J* = 8.0 Hz, Ar-H), 6.91 (d, 2H, *J* = 8.0 Hz, Ar-H), 4.89 (brs, 1H, C5), 3.87 (t, 4H, *J* = 4.4 Hz, CH<sub>2</sub>OCH<sub>2</sub>), 3.16 (t, 4H, *J* = 4.4 Hz, CH<sub>2</sub>NCH<sub>2</sub>), 2.58 (s, 3H, C=OCH<sub>3</sub>), 2.55-2.45 (m, 2H, SCH<sub>2</sub>), 2.41-2.36 (m, 2H, SCH<sub>2</sub>CH<sub>2</sub>), 2.10 (s, 3H, SCH<sub>3</sub>); <sup>13</sup>C NMR (100 MHz, CDCl<sub>3</sub>, tautomer AB only); 187.9 (C4), 169.5 (NC=O), 165.5 (C2), 163.6 (C=ONH), 148.9 (Ar quart-C), 128.4 (Ar quart-C), 121.8 (Ar tert-C), 116.2 (Ar tert-C), 97.6 (C3), 66.8 (CH<sub>2</sub>OCH<sub>2</sub>), 58.3 (C5), 49.3 (CH<sub>2</sub>NCH<sub>2</sub>), 28.5 (SCH<sub>2</sub>), 28.2 (SCH<sub>2</sub>CH<sub>2</sub>), 25.4 (C=OCH<sub>3</sub>), 15.3 (SCH<sub>3</sub>); MS (ES<sup>-</sup>); 418.15 (M - H), HRMS (M - H) calcd for C<sub>20</sub>H<sub>24</sub>N<sub>3</sub>O<sub>5</sub>S<sub>1</sub>, 418.1442; found, 418.1449.

## 10a A TAUTOMER

Spartan '02 Mechanics Program: (PC/x86)  
Release 115B

Reason for exit: Successful completion  
Mechanics CPU Time : 000:00:00.3  
Mechanics Wall Time: 000:00:00.3

Spartan '02 Quantum Mechanics Program: (PC/x86)  
Release 115B

Job type: Geometry optimization.  
Method: RB3LYP  
Basis set: 6-31G(D)  
Number of shells: 62  
Number of basis functions: 183

SCF model:

A restricted hybrid HF-DFT SCF calculation will be  
performed using Pulay DIIS extrapolation

Optimization:

| Step | Energy       | Max Grad. | Max Dist. |
|------|--------------|-----------|-----------|
| 1    | -552.5962400 | 0.023621  | 0.138404  |
| 2    | -552.6036072 | 0.009644  | 0.032444  |
| 3    | -552.6042932 | 0.002787  | 0.016188  |
| 4    | -552.6044155 | 0.001086  | 0.004488  |
| 5    | -552.6044243 | 0.000538  | 0.001014  |
| 6    | -552.6044231 | 0.000090  | 0.000316  |

Reason for exit: Successful completion  
Quantum Mechanics Program CPU Time : 000:32:01.1  
Quantum Mechanics Program Wall Time: 000:21:27.0

Spartan '02 Properties Program: (PC/x86)  
Release 115B

Orientation rotated by 179.999994991044 degrees!

Reason for exit: Successful completion  
Properties Program CPU Time : 000:00:00.5  
Properties Program Wall Time: 000:00:00.6

\*\* GEOMETRY OPTIMIZATION IN DELOCALIZED INTERNAL COORDINATES  
\*\*

Searching for a Minimum

Optimization Cycle: 6

|      |   | Coordinates (Angstroms) |           |          |
|------|---|-------------------------|-----------|----------|
| ATOM |   | X                       | Y         | Z        |
| 1    | N | 1.553777                | -0.263542 | 0.000000 |
| 2    | C | 1.506838                | 1.185329  | 0.000000 |

|    |   |           |           |           |
|----|---|-----------|-----------|-----------|
| 3  | C | 0.026292  | 1.449356  | 0.000000  |
| 4  | C | -0.676986 | 0.276958  | 0.000000  |
| 5  | C | 0.292687  | -0.845710 | 0.000000  |
| 6  | O | 0.069098  | -2.049253 | 0.000000  |
| 7  | O | -0.461222 | 2.671232  | 0.000000  |
| 8  | C | -2.129675 | 0.272786  | 0.000000  |
| 9  | O | -2.729402 | 1.365739  | 0.000000  |
| 10 | C | -2.881342 | -1.031236 | 0.000000  |
| 11 | C | 2.782826  | -1.022101 | 0.000000  |
| 12 | H | 1.987925  | 1.624171  | 0.887239  |
| 13 | H | 1.987925  | 1.624171  | -0.887239 |
| 14 | H | -1.459168 | 2.532007  | 0.000000  |
| 15 | H | -2.599379 | -1.629735 | -0.873274 |
| 16 | H | -3.955283 | -0.835946 | 0.000000  |
| 17 | H | -2.599379 | -1.629735 | 0.873274  |
| 18 | H | 3.387361  | -0.807592 | 0.891511  |
| 19 | H | 3.387361  | -0.807592 | -0.891511 |
| 20 | H | 2.509748  | -2.079307 | 0.000000  |

Point Group: cs    Number of degrees of freedom: 34

Energy is -552.604423124

Hessian Updated using BFGS Update  
internal optimization with constraints (0)

34 Hessian modes will be used to form the next step

Hessian Eigenvalues:

|          |          |          |          |          |
|----------|----------|----------|----------|----------|
| 0.052511 | 0.055510 | 0.056417 | 0.070952 | 0.127769 |
| 0.130975 |          |          |          |          |
| 0.150573 | 0.159305 | 0.177514 | 0.178309 | 0.204058 |
| 0.212112 |          |          |          |          |
| 0.220593 | 0.228453 | 0.233546 | 0.254312 | 0.270679 |
| 0.281991 |          |          |          |          |
| 0.296975 | 0.303096 | 0.305099 | 0.306704 | 0.307577 |
| 0.308449 |          |          |          |          |
| 0.310524 | 0.329528 | 0.350899 | 0.382164 | 0.443485 |
| 0.464462 |          |          |          |          |
| 0.542845 | 0.714131 | 0.813100 | 0.863274 |          |

Minimum Search - Taking Simple RFO Step

Searching for Lamda that Minimizes Along All modes

Value Taken    Lamda = -0.00000014

Step Taken.    Stepsize is 0.000813

|               | Maximum  | Tolerance | Cnvgd? |
|---------------|----------|-----------|--------|
| Gradient      | 0.000090 | 0.000300  | YES    |
| Displacement  | 0.000316 | 0.001200  | YES    |
| Energy change | 0.000001 | 0.000001  | NO     |



```
#####  
# Entering anlman.exe on Sun May 06 04:19:42 2012 #  
#####
```

Analysis of SCF Wavefunction

Total job wall time: 1.3e+006 s

### 10a B TAUTOMER

Spartan '02 Mechanics Program: (PC/x86)  
Release 115B

Reason for exit: Successful completion  
Mechanics CPU Time : 000:00:00.2  
Mechanics Wall Time: 000:00:00.2

Spartan '02 Quantum Mechanics Program: (PC/x86)  
Release 115B

Job type: Geometry optimization.  
Method: RB3LYP  
Basis set: 6-31G(D)  
Number of shells: 62  
Number of basis functions: 183

SCF model:

A restricted hybrid HF-DFT SCF calculation will be  
performed using Pulay DIIS extrapolation

Optimization:

| Step | Energy       | Max Grad. | Max Dist. |
|------|--------------|-----------|-----------|
| 1    | -552.5991897 | 0.030375  | 0.107548  |
| 2    | -552.6074004 | 0.013960  | 0.038609  |
| 3    | -552.6083457 | 0.003796  | 0.016282  |
| 4    | -552.6084863 | 0.001023  | 0.004150  |
| 5    | -552.6084886 | 0.000204  | 0.000945  |

Reason for exit: Successful completion  
Quantum Mechanics Program CPU Time : 000:26:48.4  
Quantum Mechanics Program Wall Time: 000:14:42.8

Spartan '02 Properties Program: (PC/x86)  
Release 115B

Orientation rotated by 179.999994991044 degrees!

Reason for exit: Successful completion  
Properties Program CPU Time : 000:00:00.3  
Properties Program Wall Time: 000:00:00.4

\*\* GEOMETRY OPTIMIZATION IN DELOCALIZED INTERNAL COORDINATES  
\*\*

Searching for a Minimum

Optimization Cycle: 5

|      |   | Coordinates (Angstroms) |           |           |
|------|---|-------------------------|-----------|-----------|
| ATOM |   | X                       | Y         | Z         |
| 1    | N | 1.586310                | -0.213839 | 0.000000  |
| 2    | C | 1.536102                | 1.237007  | 0.000000  |
| 3    | C | 0.037765                | 1.532582  | 0.000000  |
| 4    | C | -0.652557               | 0.270741  | 0.000000  |
| 5    | C | 0.344093                | -0.824735 | 0.000000  |
| 6    | O | 0.160021                | -2.037515 | 0.000000  |
| 7    | O | -0.472187               | 2.661860  | 0.000000  |
| 8    | C | -2.028307               | 0.199699  | 0.000000  |
| 9    | O | -2.747710               | 1.314009  | 0.000000  |
| 10   | C | -2.824199               | -1.061635 | 0.000000  |
| 11   | C | 2.826674                | -0.955457 | 0.000000  |
| 12   | H | 2.016125                | 1.674619  | -0.887578 |
| 13   | H | 2.016125                | 1.674619  | 0.887578  |
| 14   | H | -2.111659               | 2.088108  | 0.000000  |
| 15   | H | -3.475914               | -1.081288 | 0.881724  |
| 16   | H | -2.162637               | -1.928429 | 0.000000  |
| 17   | H | -3.475914               | -1.081288 | -0.881724 |
| 18   | H | 3.426266                | -0.725716 | -0.890975 |
| 19   | H | 3.426266                | -0.725716 | 0.890975  |
| 20   | H | 2.575339                | -2.017626 | 0.000000  |

Point Group: cs Number of degrees of freedom: 34

Energy is -552.608488624

Hessian Updated using BFGS Update  
internal optimization with constraints (0)

34 Hessian modes will be used to form the next step

Hessian Eigenvalues:

|          |          |          |          |          |
|----------|----------|----------|----------|----------|
| 0.053121 | 0.056099 | 0.056598 | 0.071180 | 0.123833 |
| 0.132122 |          |          |          |          |
| 0.142224 | 0.146835 | 0.168981 | 0.182364 | 0.197102 |
| 0.209779 |          |          |          |          |
| 0.210467 | 0.221605 | 0.231890 | 0.250398 | 0.270173 |
| 0.273158 |          |          |          |          |
| 0.276082 | 0.292419 | 0.303718 | 0.306650 | 0.307709 |
| 0.310569 |          |          |          |          |
| 0.312854 | 0.321230 | 0.341594 | 0.395529 | 0.431717 |
| 0.512594 |          |          |          |          |
| 0.648731 | 0.680669 | 0.821649 | 0.866505 |          |

Minimum Search - Taking Simple RFO Step  
Searching for Lamda that Minimizes Along All modes  
Value Taken Lamda = -0.00000076  
Step Taken. Stepsize is 0.001862

|               | Maximum   | Tolerance | Cnvgd? |
|---------------|-----------|-----------|--------|
| Gradient      | 0.000204  | 0.000300  | YES    |
| Displacement  | 0.000945  | 0.001200  | YES    |
| Energy change | -0.000002 | 0.000001  | NO     |

```
#####
# Entering anlman.exe on Sun May 06 04:38:49 2012 #
#####
```

Analysis of SCF Wavefunction

Total job wall time: 8.8e+005 s

### 10a C TAUTOMER

Spartan '02 Mechanics Program: (PC/x86)  
Release 115B

Reason for exit: Successful completion  
Mechanics CPU Time : 000:00:00.1  
Mechanics Wall Time: 000:00:00.2

Spartan '02 Quantum Mechanics Program: (PC/x86)  
Release 115B

Job type: Geometry optimization.  
Method: RB3LYP  
Basis set: 6-31G(D)  
Number of shells: 62  
Number of basis functions: 183

SCF model:

A restricted hybrid HF-DFT SCF calculation will be performed using Pulay DIIS extrapolation

Optimization:

| Step | Energy       | Max Grad. | Max Dist. |   |
|------|--------------|-----------|-----------|---|
| 1    | -552.5871228 | 0.049436  | 0.130259  | 1 |
| 2    | -552.6007876 | 0.010505  | 0.187450  | 1 |
| 3    | -552.6026218 | 0.005646  | 0.204341  | 1 |
| 4    | -552.6030211 | 0.003783  | 0.161886  | 1 |
| 5    | -552.6029772 | 0.006357  | 0.222468  |   |
| 6    | -552.6034428 | 0.003213  | 0.211975  |   |
| 7    | -552.6037099 | 0.001543  | 0.230797  |   |
| 8    | -552.6038365 | 0.000878  | 0.169330  |   |
| 9    | -552.6038745 | 0.001926  | 0.038243  |   |
| 10   | -552.6039220 | 0.000481  | 0.048647  |   |
| 11   | -552.6039304 | 0.001018  | 0.020277  |   |
| 12   | -552.6039486 | 0.000291  | 0.023252  |   |

|    |              |          |          |   |
|----|--------------|----------|----------|---|
| 13 | -552.6039530 | 0.000141 | 0.022391 |   |
| 14 | -552.6039503 | 0.000092 | 0.041845 |   |
| 15 | -552.6039492 | 0.000197 | 0.177355 |   |
| 16 | -552.6039341 | 0.000668 | 0.142921 | 1 |
| 17 | -552.6032730 | 0.002955 | 0.091064 |   |
| 18 | -552.6039558 | 0.000396 | 0.183535 |   |
| 19 | -552.6040081 | 0.000446 | 0.187290 |   |
| 20 | -552.6040519 | 0.000825 | 0.186118 |   |
| 21 | -552.6040740 | 0.001373 | 0.168282 |   |
| 22 | -552.6041266 | 0.001100 | 0.178649 |   |
| 23 | -552.6041548 | 0.000841 | 0.135319 |   |
| 24 | -552.6041878 | 0.000604 | 0.141565 |   |
| 25 | -552.6041838 | 0.000745 | 0.016972 |   |
| 26 | -552.6041962 | 0.000174 | 0.045826 |   |
| 27 | -552.6041956 | 0.000051 | 0.064522 |   |

Reason for exit: Successful completion

Quantum Mechanics Program CPU Time : 002:43:15.1

Quantum Mechanics Program Wall Time: 001:37:27.3

Spartan '02 Properties Program: (PC/x86)

Release 115B

Reason for exit: Successful completion

Properties Program CPU Time : 000:00:00.5

Properties Program Wall Time: 000:00:01.2

\*\* GEOMETRY OPTIMIZATION IN DELOCALIZED INTERNAL COORDINATES

\*\*

Searching for a Minimum

Optimization Cycle: 27

|      |   | Coordinates (Angstroms) |           |           |
|------|---|-------------------------|-----------|-----------|
| ATOM |   | X                       | Y         | Z         |
| 1    | N | 1.622430                | 0.015427  | 0.036597  |
| 2    | C | 1.238259                | 1.416276  | 0.206894  |
| 3    | C | -0.318129               | 1.394335  | 0.173928  |
| 4    | C | -0.680089               | 0.005968  | -0.013348 |
| 5    | C | 0.521615                | -0.740254 | -0.082995 |
| 6    | O | 0.583479                | -2.035572 | -0.246280 |
| 7    | O | -1.000475               | 2.402077  | 0.293156  |
| 8    | C | -1.931839               | -0.679531 | -0.128346 |
| 9    | O | -1.944897               | -1.928625 | -0.285233 |
| 10   | C | -3.231414               | 0.082256  | -0.064282 |
| 11   | C | 2.990364                | -0.461686 | 0.007407  |
| 12   | H | 1.634059                | 2.039612  | -0.603918 |
| 13   | H | 1.600486                | 1.816011  | 1.161582  |
| 14   | H | -0.415060               | -2.304435 | -0.299995 |
| 15   | H | -3.794957               | -0.095132 | -0.987427 |
| 16   | H | -3.836403               | -0.311895 | 0.760409  |
| 17   | H | -3.065075               | 1.152163  | 0.073285  |

18 H            3.540961   -0.005807   -0.824335  
 19 H            3.504271   -0.216260    0.944595  
 20 H            2.982415   -1.544929   -0.121693  
 Point Group: c1    Number of degrees of freedom: 54

Energy is   -552.604195637

Hessian Updated using BFGS Update  
 internal optimization with constraints (0)

54 Hessian modes will be used to form the next step  
 Hessian Eigenvalues:

|          |          |          |          |          |
|----------|----------|----------|----------|----------|
| 0.000187 | 0.000846 | 0.002519 | 0.006532 | 0.011875 |
| 0.019201 |          |          |          |          |
| 0.021012 | 0.023297 | 0.033718 | 0.035985 | 0.052266 |
| 0.054367 |          |          |          |          |
| 0.055015 | 0.055549 | 0.056147 | 0.063491 | 0.066917 |
| 0.089166 |          |          |          |          |
| 0.107864 | 0.128599 | 0.131212 | 0.138485 | 0.151339 |
| 0.163736 |          |          |          |          |
| 0.167491 | 0.185045 | 0.198706 | 0.212166 | 0.215742 |
| 0.228407 |          |          |          |          |
| 0.229589 | 0.239898 | 0.253628 | 0.263287 | 0.270964 |
| 0.294017 |          |          |          |          |
| 0.303656 | 0.305190 | 0.305775 | 0.307706 | 0.307857 |
| 0.308582 |          |          |          |          |
| 0.310140 | 0.312733 | 0.327645 | 0.338045 | 0.389876 |
| 0.410328 |          |          |          |          |
| 0.422808 | 0.470423 | 0.546972 | 0.755577 | 0.841212 |
| 0.864885 |          |          |          |          |

Minimum Search - Taking Simple RFO Step  
 Searching for Lamda that Minimizes Along All modes  
 Value Taken    Lamda = -0.00000218  
 Step Taken.    Stepsize is 0.102556

|               | Maximum  | Tolerance | Cnvgd? |
|---------------|----------|-----------|--------|
| Gradient      | 0.000051 | 0.000300  | YES    |
| Displacement  | 0.064522 | 0.001200  | NO     |
| Energy change | 0.000001 | 0.000001  | YES    |

#####  
 # Entering anlman.exe on Sun May 06 06:19:46 2012 #  
 #####

Analysis of SCF Wavefunction

Total job wall time: 5.8e+006 s

## 10a D TAUTOMER

Spartan '02 Mechanics Program: (PC/x86)  
Release 115B

Reason for exit: Successful completion  
Mechanics CPU Time : 000:00:00.1  
Mechanics Wall Time: 000:00:00.3

Spartan '02 Quantum Mechanics Program: (PC/x86)  
Release 115B

Job type: Geometry optimization.  
Method: RB3LYP  
Basis set: 6-31G(D)  
Number of shells: 62  
Number of basis functions: 183

SCF model:

A restricted hybrid HF-DFT SCF calculation will be  
performed using Pulay DIIS extrapolation

Optimization:

| Step | Energy       | Max Grad. | Max Dist. |
|------|--------------|-----------|-----------|
| 1    | -552.6004501 | 0.031675  | 0.103239  |
| 2    | -552.6096787 | 0.014116  | 0.164904  |
| 3    | -552.6107933 | 0.004552  | 0.171504  |
| 4    | -552.6108469 | 0.002244  | 0.175373  |
| 5    | -552.6109721 | 0.002005  | 0.066418  |
| 6    | -552.6110430 | 0.000578  | 0.022524  |
| 7    | -552.6110482 | 0.000450  | 0.012837  |
| 8    | -552.6110527 | 0.000170  | 0.005036  |
| 9    | -552.6110516 | 0.000048  | 0.006513  |
| 10   | -552.6110480 | 0.000033  | 0.003052  |
| 11   | -552.6110489 | 0.000023  | 0.000682  |

Reason for exit: Successful completion  
Quantum Mechanics Program CPU Time : 001:02:06.8  
Quantum Mechanics Program Wall Time: 000:43:51.0

Spartan '02 Properties Program: (PC/x86)  
Release 115B

Reason for exit: Successful completion  
Properties Program CPU Time : 000:00:00.4  
Properties Program Wall Time: 000:00:00.8

\*\* GEOMETRY OPTIMIZATION IN DELOCALIZED INTERNAL COORDINATES  
\*\*

Searching for a Minimum

Optimization Cycle: 11

|      |   | Coordinates (Angstroms) |           |           |
|------|---|-------------------------|-----------|-----------|
| ATOM |   | X                       | Y         | Z         |
| 1    | N | 1.652107                | -0.056066 | 0.004685  |
| 2    | C | 1.319486                | 1.361033  | 0.022632  |
| 3    | C | -0.226597               | 1.392437  | 0.018981  |
| 4    | C | -0.647364               | -0.000342 | -0.001899 |
| 5    | C | 0.545921                | -0.853051 | -0.009599 |
| 6    | O | 0.547159                | -2.099617 | -0.026313 |
| 7    | O | -0.880622               | 2.424147  | 0.032311  |
| 8    | C | -1.907677               | -0.554670 | -0.013741 |
| 9    | O | -2.060370               | -1.869668 | -0.032261 |
| 10   | C | -3.179119               | 0.226870  | -0.007635 |
| 11   | C | 3.007650                | -0.561340 | 0.001903  |
| 12   | H | 1.713012                | 1.887466  | -0.857553 |
| 13   | H | 1.708407                | 1.863900  | 0.918473  |
| 14   | H | -1.137392               | -2.276755 | -0.034446 |
| 15   | H | -2.972802               | 1.297511  | 0.006747  |
| 16   | H | -3.770460               | -0.030844 | -0.894325 |
| 17   | H | -3.775646               | -0.053201 | 0.868767  |
| 18   | H | 3.549909                | -0.234202 | 0.898274  |
| 19   | H | 3.554638                | -0.212033 | -0.883174 |
| 20   | H | 2.959762                | -1.651575 | -0.011828 |

Point Group: c1 Number of degrees of freedom: 54

Energy is -552.611048871

Hessian Updated using BFGS Update  
internal optimization with constraints (0)

54 Hessian modes will be used to form the next step

Hessian Eigenvalues:

|          |          |          |          |          |
|----------|----------|----------|----------|----------|
| 0.001079 | 0.001422 | 0.005573 | 0.006824 | 0.010373 |
| 0.015754 |          |          |          |          |
| 0.021829 | 0.024291 | 0.028709 | 0.043085 | 0.051379 |
| 0.054470 |          |          |          |          |
| 0.055225 | 0.055876 | 0.056230 | 0.057753 | 0.072077 |
| 0.084283 |          |          |          |          |
| 0.093563 | 0.126088 | 0.131003 | 0.145621 | 0.146875 |
| 0.151080 |          |          |          |          |
| 0.169409 | 0.184129 | 0.192062 | 0.197186 | 0.209784 |
| 0.217475 |          |          |          |          |
| 0.221151 | 0.236225 | 0.237880 | 0.264926 | 0.273176 |
| 0.283661 |          |          |          |          |
| 0.293566 | 0.303092 | 0.304261 | 0.306800 | 0.307835 |
| 0.309369 |          |          |          |          |
| 0.310416 | 0.311685 | 0.312857 | 0.324863 | 0.340515 |
| 0.388067 |          |          |          |          |
| 0.417079 | 0.516116 | 0.570588 | 0.696533 | 0.841361 |

0.849564

Minimum Search - Taking Simple RFO Step  
Searching for Lamda that Minimizes Along All modes  
Value Taken Lamda = -0.00000001  
Step Taken. Stepsize is 0.001249

|               | Maximum   | Tolerance | Cnvgd? |
|---------------|-----------|-----------|--------|
| Gradient      | 0.000023  | 0.000300  | YES    |
| Displacement  | 0.000682  | 0.001200  | YES    |
| Energy change | -0.000001 | 0.000001  | YES    |

#####  
# Entering anlman.exe on Sun May 06 07:07:50 2012 #  
#####

Analysis of SCF Wavefunction

Total job wall time: 2.6e+006 s

## 11a A TAUTOMER

Spartan '02 Mechanics Program: (PC/x86)  
Release 115B

Reason for exit: Successful completion  
Mechanics CPU Time : 000:00:00.2  
Mechanics Wall Time: 000:00:00.2

Spartan '02 Quantum Mechanics Program: (PC/x86)  
Release 115B

To use a standard Psuedopotential a heavy atom must exists  
(An atom larger than 'Ar')

Job type: Geometry optimization.  
Method: RB3LYP  
Basis set: LACVP\*  
Number of shells: 92  
Number of basis functions: 200

SCF model:

A restricted hybrid HF-DFT SCF calculation will be  
performed using Pulay DIIS extrapolation

Optimization:

| Step | Energy       | Max Grad. | Max Dist. |
|------|--------------|-----------|-----------|
| 1    | -607.9706244 | 0.025132  | 0.108364  |
| 2    | -607.9780656 | 0.009302  | 0.029426  |
| 3    | -607.9787417 | 0.002776  | 0.015587  |



|   |              |          |          |
|---|--------------|----------|----------|
| 4 | -607.9788546 | 0.000895 | 0.003513 |
| 5 | -607.9788625 | 0.000408 | 0.001042 |
| 6 | -607.9788641 | 0.000074 | 0.000166 |

Reason for exit: Successful completion

Quantum Mechanics Program CPU Time : 000:27:32.4

Quantum Mechanics Program Wall Time: 000:27:57.5

Spartan '02 Properties Program: (PC/x86)

Release 115B

Orientation rotated by 179.999994991044 degrees!

Reason for exit: Successful completion

Properties Program CPU Time : 000:00:00.5

Properties Program Wall Time: 000:00:00.6

\*\* GEOMETRY OPTIMIZATION IN DELOCALIZED INTERNAL COORDINATES

\*\*

Searching for a Minimum

Optimization Cycle: 6

|      |   | Coordinates (Angstroms) |           |           |
|------|---|-------------------------|-----------|-----------|
| ATOM |   | X                       | Y         | Z         |
| 1    | N | 2.003578                | -0.382055 | 0.000000  |
| 2    | C | 2.116756                | 1.067930  | 0.000000  |
| 3    | C | 0.672738                | 1.497694  | 0.000000  |
| 4    | C | -0.141747               | 0.411441  | 0.000000  |
| 5    | C | 0.686794                | -0.804587 | 0.000000  |
| 6    | O | 0.304214                | -1.975857 | 0.000000  |
| 7    | O | 0.311315                | 2.768021  | 0.000000  |
| 8    | C | -1.597962               | 0.541626  | 0.000000  |
| 9    | O | -2.120288               | 1.680399  | 0.000000  |
| 10   | N | -2.306452               | -0.604420 | 0.000000  |
| 11   | C | 3.137000                | -1.277337 | 0.000000  |
| 12   | C | -3.758194               | -0.620521 | 0.000000  |
| 13   | H | 2.646269                | 1.444047  | 0.887487  |
| 14   | H | 2.646269                | 1.444047  | -0.887487 |
| 15   | H | -0.694565               | 2.728612  | 0.000000  |
| 16   | H | -1.766323               | -1.467083 | 0.000000  |
| 17   | H | 3.761936                | -1.133819 | 0.891436  |
| 18   | H | 2.745511                | -2.296626 | 0.000000  |
| 19   | H | 3.761936                | -1.133819 | -0.891436 |
| 20   | H | -4.156683               | -0.114352 | -0.885978 |
| 21   | H | -4.095419               | -1.658987 | 0.000000  |
| 22   | H | -4.156683               | -0.114352 | 0.885978  |

Point Group: cs Number of degrees of freedom: 38

Energy is -607.978864132

Hessian Updated using BFGS Update

internal optimization with constraints (0)

38 Hessian modes will be used to form the next step

Hessian Eigenvalues:

|          |          |          |          |          |
|----------|----------|----------|----------|----------|
| 0.053074 | 0.054479 | 0.056089 | 0.071223 | 0.130382 |
| 0.131687 |          |          |          |          |
| 0.143378 | 0.159769 | 0.165635 | 0.175288 | 0.182345 |
| 0.197909 |          |          |          |          |
| 0.205124 | 0.210331 | 0.220329 | 0.229939 | 0.250684 |
| 0.260765 |          |          |          |          |
| 0.271643 | 0.293684 | 0.298213 | 0.306600 | 0.307186 |
| 0.307528 |          |          |          |          |
| 0.308327 | 0.309303 | 0.322285 | 0.331283 | 0.352002 |
| 0.382227 |          |          |          |          |
| 0.404947 | 0.419200 | 0.443702 | 0.485579 | 0.538339 |
| 0.675581 |          |          |          |          |
| 0.800994 | 0.851060 |          |          |          |

Minimum Search - Taking Simple RFO Step

Searching for Lamda that Minimizes Along All modes

Value Taken Lamda = -0.00000005

Step Taken. Stepsize is 0.000442

|               | Maximum   | Tolerance | Cnvgd? |
|---------------|-----------|-----------|--------|
| Gradient      | 0.000074  | 0.000300  | YES    |
| Displacement  | 0.000166  | 0.001200  | YES    |
| Energy change | -0.000002 | 0.000001  | NO     |

```
#####  
# Entering anlman.exe on Sat May 19 20:40:31 2012 #  
#####
```

Analysis of SCF Wavefunction

Total job wall time: 1.7e+006 s

## 11a B TAUTOMER

Spartan '02 Mechanics Program: (PC/x86)  
Release 115B

Reason for exit: Successful completion

Mechanics CPU Time : 000:00:00.1

Mechanics Wall Time: 000:00:00.1

Spartan '02 Quantum Mechanics Program: (PC/x86)  
Release 115B

To use a standard Psuedopotential a heavy atom must exists  
(An atom larger than 'Ar')

Job type: Geometry optimization.

Method: RB3LYP  
Basis set: LACVP\*  
Number of shells: 92  
Number of basis functions: 200

SCF model:

A restricted hybrid HF-DFT SCF calculation will be performed using Pulay DIIS extrapolation

Optimization:

| Step | Energy       | Max Grad. | Max Dist. |
|------|--------------|-----------|-----------|
| 1    | -607.9634195 | 0.042025  | 0.119293  |
| 2    | -607.9757193 | 0.012383  | 0.037746  |
| 3    | -607.9771848 | 0.004399  | 0.016434  |
| 4    | -607.9773666 | 0.001623  | 0.004735  |
| 5    | -607.9773829 | 0.000515  | 0.001581  |
| 6    | -607.9773838 | 0.000163  | 0.000470  |

Reason for exit: Successful completion

Quantum Mechanics Program CPU Time : 000:33:51.9

Quantum Mechanics Program Wall Time: 000:34:14.4

Spartan '02 Properties Program: (PC/x86)

Release 115B

Orientation rotated by 179.999994991044 degrees!

Reason for exit: Successful completion

Properties Program CPU Time : 000:00:00.4

Properties Program Wall Time: 000:00:00.6

\*\* GEOMETRY OPTIMIZATION IN DELOCALIZED INTERNAL COORDINATES

\*\*

Searching for a Minimum

Optimization Cycle: 6

|      |   | Coordinates (Angstroms) |           |           |
|------|---|-------------------------|-----------|-----------|
| ATOM |   | X                       | Y         | Z         |
| 1    | N | 2.030824                | -0.323556 | 0.000000  |
| 2    | C | 2.140826                | 1.130414  | 0.000000  |
| 3    | C | 0.678628                | 1.598519  | 0.000000  |
| 4    | C | -0.113707               | 0.429295  | 0.000000  |
| 5    | C | 0.721211                | -0.761873 | 0.000000  |
| 6    | O | 0.347949                | -1.942514 | 0.000000  |
| 7    | O | 0.281703                | 2.780893  | 0.000000  |
| 8    | C | -1.512542               | 0.470536  | 0.000000  |
| 9    | O | -2.138252               | 1.638821  | 0.000000  |
| 10   | N | -2.252125               | -0.636911 | 0.000000  |
| 11   | C | 3.169764                | -1.210650 | 0.000000  |
| 12   | C | -3.706217               | -0.658161 | 0.000000  |
| 13   | H | 2.668912                | 1.506016  | -0.887804 |

|    |   |           |           |           |
|----|---|-----------|-----------|-----------|
| 14 | H | 2.668912  | 1.506016  | 0.887804  |
| 15 | H | -1.416053 | 2.342721  | 0.000000  |
| 16 | H | -1.700091 | -1.496318 | 0.000000  |
| 17 | H | 3.794592  | -1.059636 | 0.890734  |
| 18 | H | 2.789939  | -2.234365 | 0.000000  |
| 19 | H | 3.794592  | -1.059636 | -0.890734 |
| 20 | H | -4.108657 | -0.159942 | 0.888188  |
| 21 | H | -4.108657 | -0.159942 | -0.888188 |
| 22 | H | -4.031551 | -1.699728 | 0.000000  |

Point Group: cs    Number of degrees of freedom: 38

Energy is    -607.977383841

Hessian Updated using BFGS Update  
 internal optimization with constraints (0)

38 Hessian modes will be used to form the next step

Hessian Eigenvalues:

|          |          |          |          |          |
|----------|----------|----------|----------|----------|
| 0.052727 | 0.054623 | 0.056162 | 0.070829 | 0.129217 |
| 0.131888 |          |          |          |          |
| 0.133454 | 0.149834 | 0.160627 | 0.169744 | 0.185462 |
| 0.199528 |          |          |          |          |
| 0.208465 | 0.213324 | 0.216744 | 0.225666 | 0.239980 |
| 0.251028 |          |          |          |          |
| 0.270389 | 0.285908 | 0.291870 | 0.304578 | 0.305262 |
| 0.306318 |          |          |          |          |
| 0.307035 | 0.308725 | 0.311415 | 0.334081 | 0.354335 |
| 0.374813 |          |          |          |          |
| 0.388270 | 0.419292 | 0.422847 | 0.542491 | 0.577885 |
| 0.640683 |          |          |          |          |
| 0.824536 | 0.848724 |          |          |          |

Minimum Search - Taking Simple RFO Step  
 Searching for Lamda that Minimizes Along All modes  
 Value Taken    Lamda = -0.00000034  
 Step Taken.    Stepsize is 0.001242

|               | Maximum   | Tolerance | Cnvgd? |
|---------------|-----------|-----------|--------|
| Gradient      | 0.000163  | 0.000300  | YES    |
| Displacement  | 0.000470  | 0.001200  | YES    |
| Energy change | -0.000001 | 0.000001  | YES    |

#####  
 # Entering anlman.exe on Mon May 21 04:39:33 2012 #  
 #####

Analysis of SCF Wavefunction

Total job wall time: 2.1e+006 s

## 11a C TAUTOMER

Spartan '02 Mechanics Program: (PC/x86)  
Release 115B

Reason for exit: Successful completion  
Mechanics CPU Time : 000:00:00.1  
Mechanics Wall Time: 000:00:00.1

Spartan '02 Quantum Mechanics Program: (PC/x86)  
Release 115B

To use a standard Psuedopotential a heavy atom must exists  
(An atom larger than 'Ar')

Job type: Geometry optimization.

Method: RB3LYP

Basis set: LACVP\*

Number of shells: 92

Number of basis functions: 200

SCF model:

A restricted hybrid HF-DFT SCF calculation will be  
performed using Pulay DIIS extrapolation

Optimization:

| Step | Energy       | Max Grad. | Max Dist. |   |
|------|--------------|-----------|-----------|---|
| 1    | -607.9582059 | 0.047656  | 0.118759  | 2 |
| 2    | -607.9719615 | 0.010918  | 0.147967  | 2 |
| 3    | -607.9734362 | 0.006198  | 0.168650  | 2 |
| 4    | -607.9739292 | 0.003675  | 0.168116  | 2 |
| 5    | -607.9740010 | 0.002312  | 0.202365  | 1 |
| 6    | -607.9743363 | 0.001267  | 0.176407  | 1 |
| 7    | -607.9745321 | 0.001624  | 0.162645  | 1 |
| 8    | -607.9746194 | 0.001446  | 0.197190  |   |
| 9    | -607.9747249 | 0.001185  | 0.154816  |   |
| 10   | -607.9747570 | 0.000940  | 0.091768  |   |
| 11   | -607.9747739 | 0.000801  | 0.130265  |   |
| 12   | -607.9748132 | 0.001177  | 0.159244  | 1 |
| 13   | -607.9682148 | 0.029147  | 0.124393  |   |
| 14   | -607.9747971 | 0.001768  | 0.168932  |   |
| 15   | -607.9749115 | 0.001096  | 0.167406  |   |
| 16   | -607.9749838 | 0.000839  | 0.186742  |   |
| 17   | -607.9750584 | 0.000548  | 0.198997  |   |
| 18   | -607.9751276 | 0.000746  | 0.207746  |   |
| 19   | -607.9751748 | 0.000681  | 0.213777  |   |
| 20   | -607.9752388 | 0.001056  | 0.170694  |   |
| 21   | -607.9752723 | 0.000729  | 0.072714  |   |
| 22   | -607.9752754 | 0.000541  | 0.023168  |   |
| 23   | -607.9752816 | 0.000150  | 0.014099  |   |
| 24   | -607.9752834 | 0.000084  | 0.004780  |   |
| 25   | -607.9752856 | 0.000021  | 0.001262  |   |

26 -607.9752862 0.000009 0.000502  
Reason for exit: Successful completion  
Quantum Mechanics Program CPU Time : 001:46:04.5  
Quantum Mechanics Program Wall Time: 001:50:46.6

Spartan '02 Properties Program: (PC/x86)  
Release 115B

Reason for exit: Successful completion  
Properties Program CPU Time : 000:00:00.5  
Properties Program Wall Time: 000:00:00.8

\*\* GEOMETRY OPTIMIZATION IN DELOCALIZED INTERNAL COORDINATES  
\*\*

Searching for a Minimum

Optimization Cycle: 26

|      |   | Coordinates (Angstroms) |           |           |
|------|---|-------------------------|-----------|-----------|
| ATOM |   | X                       | Y         | Z         |
| 1    | N | 2.114878                | -0.015130 | 0.011005  |
| 2    | C | 1.790908                | 1.401292  | -0.173150 |
| 3    | C | 0.237179                | 1.433426  | -0.181704 |
| 4    | C | -0.172813               | 0.077290  | -0.005631 |
| 5    | C | 0.973151                | -0.722530 | 0.099126  |
| 6    | O | 0.969038                | -2.024062 | 0.264666  |
| 7    | O | -0.440530               | 2.453237  | -0.317784 |
| 8    | C | -1.489210               | -0.524337 | 0.068488  |
| 9    | O | -1.604927               | -1.769619 | 0.227210  |
| 10   | N | -2.541578               | 0.316046  | -0.041188 |
| 11   | C | 3.458644                | -0.549930 | 0.068948  |
| 12   | C | -3.923772               | -0.118046 | 0.008214  |
| 13   | H | 2.195551                | 1.782528  | -1.118473 |
| 14   | H | 2.190252                | 2.010876  | 0.646434  |
| 15   | H | -0.030965               | -2.247533 | 0.290921  |
| 16   | H | -2.309823               | 1.298638  | -0.166784 |
| 17   | H | 4.003540                | -0.336620 | -0.859118 |
| 18   | H | 4.015267                | -0.115975 | 0.908839  |
| 19   | H | 3.400128                | -1.631068 | 0.204424  |
| 20   | H | -3.932287               | -1.201588 | 0.132731  |
| 21   | H | -4.452398               | 0.342979  | 0.851232  |
| 22   | H | -4.450235               | 0.140126  | -0.918405 |

Point Group: c1 Number of degrees of freedom: 60

Energy is -607.975286203

Hessian Updated using BFGS Update  
internal optimization with constraints (0)

60 Hessian modes will be used to form the next step  
Hessian Eigenvalues:

|          |          |          |          |          |
|----------|----------|----------|----------|----------|
| 0.000499 | 0.000980 | 0.003419 | 0.003729 | 0.005615 |
| 0.008627 |          |          |          |          |
| 0.016833 | 0.019778 | 0.025269 | 0.028683 | 0.035951 |
| 0.047308 |          |          |          |          |
| 0.053310 | 0.054458 | 0.054710 | 0.055602 | 0.056171 |
| 0.056844 |          |          |          |          |
| 0.066640 | 0.090013 | 0.094680 | 0.131464 | 0.132030 |
| 0.144906 |          |          |          |          |
| 0.162508 | 0.172483 | 0.181111 | 0.190039 | 0.197230 |
| 0.205641 |          |          |          |          |
| 0.207097 | 0.212823 | 0.225486 | 0.229215 | 0.233188 |
| 0.253423 |          |          |          |          |
| 0.262161 | 0.291884 | 0.301455 | 0.303157 | 0.305911 |
| 0.307876 |          |          |          |          |
| 0.308053 | 0.308569 | 0.309598 | 0.315204 | 0.319104 |
| 0.324098 |          |          |          |          |
| 0.348642 | 0.363864 | 0.390094 | 0.407800 | 0.429305 |
| 0.440071 |          |          |          |          |
| 0.474413 | 0.500497 | 0.543644 | 0.739364 | 0.836474 |
| 0.845653 |          |          |          |          |

Minimum Search - Taking Simple RFO Step  
 Searching for Lamda that Minimizes Along All modes  
 Value Taken Lamda = 0.00000000  
 Step Taken. Stepsize is 0.001100

|               | Maximum   | Tolerance | Cnvgd? |
|---------------|-----------|-----------|--------|
| Gradient      | 0.000009  | 0.000300  | YES    |
| Displacement  | 0.000502  | 0.001200  | YES    |
| Energy change | -0.000001 | 0.000001  | YES    |

#####  
 # Entering anlman.exe on Sat May 19 10:27:11 2012 #  
 #####

Analysis of SCF Wavefunction

Total job wall time: 6.6e+006 s

### 11a D TAUTOMER

Spartan '02 Mechanics Program: (PC/x86)  
 Release 115B

Reason for exit: Successful completion  
 Mechanics CPU Time : 000:00:00.3  
 Mechanics Wall Time: 000:00:00.4

Spartan '02 Quantum Mechanics Program: (PC/x86)  
 Release 115B

To use a standard Psuedopotential a heavy atom must exists

(An atom larger than 'Ar')

Job type: Geometry optimization.  
Method: RB3LYP  
Basis set: LACVP\*  
Number of shells: 92  
Number of basis functions: 200

SCF model:

A restricted hybrid HF-DFT SCF calculation will be performed using Pulay DIIS extrapolation

Optimization:

| Step | Energy       | Max Grad. | Max Dist. |   |
|------|--------------|-----------|-----------|---|
| 1    | -607.9639061 | 0.043796  | 0.129858  | 1 |
| 2    | -607.9763578 | 0.011497  | 0.046744  | 1 |
| 3    | -607.9778463 | 0.003966  | 0.016192  |   |
| 4    | -607.9780374 | 0.001674  | 0.161606  | 1 |
| 5    | -607.9779298 | 0.001686  | 0.143172  |   |
| 6    | -607.9780569 | 0.000427  | 0.013233  |   |
| 7    | -607.9780522 | 0.000155  | 0.008005  |   |
| 8    | -607.9780533 | 0.000090  | 0.004550  |   |
| 9    | -607.9780533 | 0.000061  | 0.008815  |   |

Reason for exit: Successful completion

Quantum Mechanics Program CPU Time : 000:39:36.5

Quantum Mechanics Program Wall Time: 000:40:02.9

Spartan '02 Properties Program: (PC/x86)  
Release 115B

Reason for exit: Successful completion

Properties Program CPU Time : 000:00:00.5

Properties Program Wall Time: 000:00:00.6

\*\* GEOMETRY OPTIMIZATION IN DELOCALIZED INTERNAL COORDINATES  
\*\*

Searching for a Minimum

Optimization Cycle: 9

|      |   | Coordinates (Angstroms) |           |           |
|------|---|-------------------------|-----------|-----------|
| ATOM |   | X                       | Y         | Z         |
| 1    | N | 2.144713                | -0.077092 | -0.001004 |
| 2    | C | 1.845657                | 1.351906  | 0.001563  |
| 3    | C | 0.300412                | 1.410529  | 0.000491  |
| 4    | C | -0.128961               | 0.054546  | -0.002557 |
| 5    | C | 1.006763                | -0.840187 | -0.003226 |
| 6    | O | 0.952954                | -2.088951 | -0.005297 |
| 7    | O | -0.378147               | 2.443385  | 0.002355  |
| 8    | C | -1.441723               | -0.428591 | -0.002888 |



|    |   |           |           |           |
|----|---|-----------|-----------|-----------|
| 9  | O | -1.679273 | -1.731578 | -0.004226 |
| 10 | N | -2.489368 | 0.396512  | -0.001990 |
| 11 | C | 3.482979  | -0.620943 | 0.000343  |
| 12 | C | -3.876806 | -0.039821 | 0.002655  |
| 13 | H | 2.252535  | 1.857005  | -0.885103 |
| 14 | H | 2.251017  | 1.853441  | 0.890953  |
| 15 | H | -0.770840 | -2.176607 | -0.005503 |
| 16 | H | -2.238087 | 1.384838  | 0.001327  |
| 17 | H | 4.039900  | -0.305179 | 0.892589  |
| 18 | H | 3.400582  | -1.709654 | -0.001884 |
| 19 | H | 4.043003  | -0.301735 | -0.888702 |
| 20 | H | -4.105678 | -0.621855 | 0.901635  |
| 21 | H | -4.512789 | 0.846693  | -0.017264 |
| 22 | H | -4.098844 | -0.656660 | -0.874268 |

Point Group: c1      Number of degrees of freedom: 60

Energy is -607.978053344

Hessian Updated using BFGS Update  
internal optimization with constraints (0)

60 Hessian modes will be used to form the next step

Hessian Eigenvalues:

|          |          |          |          |          |
|----------|----------|----------|----------|----------|
| 0.000614 | 0.000910 | 0.004371 | 0.005724 | 0.007182 |
| 0.010917 |          |          |          |          |
| 0.014387 | 0.018934 | 0.028600 | 0.031023 | 0.036369 |
| 0.042395 |          |          |          |          |
| 0.051947 | 0.054585 | 0.054594 | 0.055619 | 0.056116 |
| 0.056294 |          |          |          |          |
| 0.071804 | 0.091920 | 0.093704 | 0.129227 | 0.131554 |
| 0.137022 |          |          |          |          |
| 0.151588 | 0.161480 | 0.165527 | 0.167361 | 0.175441 |
| 0.193342 |          |          |          |          |
| 0.198743 | 0.212627 | 0.214247 | 0.216035 | 0.223386 |
| 0.231721 |          |          |          |          |
| 0.240650 | 0.270763 | 0.283023 | 0.299460 | 0.304822 |
| 0.305681 |          |          |          |          |
| 0.306159 | 0.306560 | 0.307655 | 0.308586 | 0.310129 |
| 0.310947 |          |          |          |          |
| 0.316571 | 0.339660 | 0.351386 | 0.382021 | 0.399139 |
| 0.417850 |          |          |          |          |
| 0.426032 | 0.541407 | 0.549274 | 0.655806 | 0.824533 |
| 0.849511 |          |          |          |          |

Minimum Search - Taking Simple RFO Step  
Searching for Lamda that Minimizes Along All modes  
Value Taken      Lamda = -0.00000028  
Step Taken.      Stepsize is 0.017131

|         |           |        |
|---------|-----------|--------|
| Maximum | Tolerance | Cnvgd? |
|---------|-----------|--------|

|               |          |          |     |
|---------------|----------|----------|-----|
| Gradient      | 0.000061 | 0.000300 | YES |
| Displacement  | 0.008815 | 0.001200 | NO  |
| Energy change | 0.000000 | 0.000001 | YES |

```
#####
# Entering anlman.exe on Sat May 19 08:35:47 2012 #
#####
```

Analysis of SCF Wavefunction

Total job wall time: 2.4e+006 s

### 11b A TAUTOMER

Spartan '02 Mechanics Program: (PC/x86)  
Release 115B

Reason for exit: Successful completion  
Mechanics CPU Time : 000:00:00.2  
Mechanics Wall Time: 000:00:00.2

Spartan '02 Quantum Mechanics Program: (PC/x86)  
Release 115B

To use a standard Psuedopotential a heavy atom must exists  
(An atom larger than 'Ar')

Job type: Geometry optimization.  
Method: RB3LYP  
Basis set: LACVP\*  
Number of shells: 104  
Number of basis functions: 230

SCF model:

A restricted hybrid HF-DFT SCF calculation will be  
performed using Pulay DIIS extrapolation

Optimization:

| Step | Energy       | Max Grad. | Max Dist. |
|------|--------------|-----------|-----------|
| 1    | -721.3170928 | 0.034108  | 0.114632  |
| 2    | -721.3263466 | 0.006482  | 0.028010  |
| 3    | -721.3270991 | 0.003467  | 0.014555  |
| 4    | -721.3272302 | 0.001268  | 0.005208  |
| 5    | -721.3272472 | 0.000500  | 0.001160  |
| 6    | -721.3272504 | 0.000069  | 0.000258  |

Reason for exit: Successful completion  
Quantum Mechanics Program CPU Time : 000:36:32.4  
Quantum Mechanics Program Wall Time: 000:36:53.7

Spartan '02 Properties Program: (PC/x86)  
Release 115B

Orientation rotated by 179.999994991044 degrees!  
Reason for exit: Successful completion  
Properties Program CPU Time : 000:00:00.6  
Properties Program Wall Time: 000:00:00.8

\*\* GEOMETRY OPTIMIZATION IN DELOCALIZED INTERNAL COORDINATES  
\*\*

Searching for a Minimum

Optimization Cycle: 6

|      |   | Coordinates (Angstroms) |           |           |
|------|---|-------------------------|-----------|-----------|
| ATOM |   | X                       | Y         | Z         |
| 1    | N | 1.747191                | 0.273699  | 0.000000  |
| 2    | C | 1.554297                | 1.728305  | 0.000000  |
| 3    | C | 0.059598                | 1.845869  | 0.000000  |
| 4    | C | -0.527577               | 0.615156  | 0.000000  |
| 5    | C | 0.507652                | -0.412708 | 0.000000  |
| 6    | O | 0.357682                | -1.630162 | 0.000000  |
| 7    | O | -0.550909               | 3.009957  | 0.000000  |
| 8    | C | -1.985142               | 0.465578  | 0.000000  |
| 9    | O | -2.707391               | 1.489019  | 0.000000  |
| 10   | N | -2.475754               | -0.787810 | 0.000000  |
| 11   | C | 3.052005                | -0.236863 | 0.000000  |
| 12   | C | -3.903850               | -1.059040 | 0.000000  |
| 13   | C | 3.224162                | -1.736982 | 0.000000  |
| 14   | O | 3.986018                | 0.547581  | 0.000000  |
| 15   | H | 2.008773                | 2.190898  | 0.882998  |
| 16   | H | 2.008773                | 2.190898  | -0.882998 |
| 17   | H | -1.531769               | 2.770403  | 0.000000  |
| 18   | H | -1.796034               | -1.543239 | 0.000000  |
| 19   | H | -4.383131               | -0.629826 | -0.886153 |
| 20   | H | -4.052865               | -2.140384 | 0.000000  |
| 21   | H | -4.383131               | -0.629826 | 0.886153  |
| 22   | H | 2.748117                | -2.187862 | 0.875264  |
| 23   | H | 2.748117                | -2.187862 | -0.875264 |
| 24   | H | 4.295168                | -1.944799 | 0.000000  |

Point Group: cs Number of degrees of freedom: 42

Energy is -721.327250423

Hessian Updated using BFGS Update  
internal optimization with constraints (0)

42 Hessian modes will be used to form the next step

Hessian Eigenvalues:  
0.051308 0.054479 0.055506 0.074351 0.128611  
0.130299  
0.143684 0.151156 0.164729 0.166957 0.176615  
0.178562

|          |          |          |          |          |
|----------|----------|----------|----------|----------|
| 0.198665 | 0.205485 | 0.214700 | 0.225257 | 0.232870 |
| 0.239808 |          |          |          |          |
| 0.257597 | 0.267002 | 0.279829 | 0.290934 | 0.298472 |
| 0.305334 |          |          |          |          |
| 0.305556 | 0.307019 | 0.307852 | 0.308194 | 0.309269 |
| 0.323222 |          |          |          |          |
| 0.348293 | 0.399980 | 0.410308 | 0.419374 | 0.447581 |
| 0.484422 |          |          |          |          |
| 0.543271 | 0.576030 | 0.707413 | 0.800702 | 0.807014 |
| 0.847165 |          |          |          |          |

Minimum Search - Taking Simple RFO Step  
 Searching for Lamda that Minimizes Along All modes  
 Value Taken Lamda = -0.00000012  
 Step Taken. Stepsize is 0.000731

|               | Maximum   | Tolerance | Cnvgd? |
|---------------|-----------|-----------|--------|
| Gradient      | 0.000069  | 0.000300  | YES    |
| Displacement  | 0.000258  | 0.001200  | YES    |
| Energy change | -0.000003 | 0.000001  | NO     |

#####  
 # Entering anlman.exe on Tue May 22 07:08:40 2012 #  
 #####

Analysis of SCF Wavefunction

Total job wall time: 2.2e+006 s

## 11b B TAUTOMER

Spartan '02 Mechanics Program: (PC/x86)  
 Release 115B

Reason for exit: Successful completion  
 Mechanics CPU Time : 000:00:00.1  
 Mechanics Wall Time: 000:00:00.2

Spartan '02 Quantum Mechanics Program: (PC/x86)  
 Release 115B

To use a standard Psuedopotential a heavy atom must exists  
 (An atom larger than 'Ar')

Job type: Geometry optimization.  
 Method: RB3LYP  
 Basis set: LACVP\*  
 Number of shells: 104  
 Number of basis functions: 230

SCF model:

A restricted hybrid HF-DFT SCF calculation will be

performed using Pulay DIIS extrapolation

Optimization:

| Step | Energy       | Max Grad. | Max Dist. |
|------|--------------|-----------|-----------|
| 1    | -721.3112034 | 0.040058  | 0.121705  |
| 2    | -721.3243264 | 0.011609  | 0.042586  |
| 3    | -721.3258197 | 0.004764  | 0.013576  |
| 4    | -721.3260139 | 0.001838  | 0.005420  |
| 5    | -721.3260289 | 0.000613  | 0.001938  |
| 6    | -721.3260354 | 0.000189  | 0.000583  |

Reason for exit: Successful completion

Quantum Mechanics Program CPU Time : 000:49:57.5

Quantum Mechanics Program Wall Time: 000:51:25.1

Spartan '02 Properties Program: (PC/x86)

Release 115B

Orientation rotated by 179.999994991044 degrees!

Reason for exit: Successful completion

Properties Program CPU Time : 000:00:00.7

Properties Program Wall Time: 000:00:00.8

\*\* GEOMETRY OPTIMIZATION IN DELOCALIZED INTERNAL COORDINATES

\*\*

Searching for a Minimum

Optimization Cycle: 6

|      |   | Coordinates (Angstroms) |           |           |
|------|---|-------------------------|-----------|-----------|
| ATOM |   | X                       | Y         | Z         |
| 1    | N | 1.762303                | 0.315697  | 0.000000  |
| 2    | C | 1.574982                | 1.776437  | 0.000000  |
| 3    | C | 0.059356                | 1.940776  | 0.000000  |
| 4    | C | -0.499875               | 0.639054  | 0.000000  |
| 5    | C | 0.526291                | -0.373992 | 0.000000  |
| 6    | O | 0.374300                | -1.597546 | 0.000000  |
| 7    | O | -0.564678               | 3.019073  | 0.000000  |
| 8    | C | -1.889609               | 0.424753  | 0.000000  |
| 9    | O | -2.709602               | 1.460972  | 0.000000  |
| 10   | N | -2.423048               | -0.792826 | 0.000000  |
| 11   | C | 3.062183                | -0.202027 | 0.000000  |
| 12   | C | -3.855111               | -1.058676 | 0.000000  |
| 13   | C | 3.230524                | -1.704047 | 0.000000  |
| 14   | O | 4.003930                | 0.574385  | 0.000000  |
| 15   | H | 2.033276                | 2.233348  | -0.883032 |
| 16   | H | 2.033276                | 2.233348  | 0.883032  |
| 17   | H | -2.124795               | 2.286701  | 0.000000  |
| 18   | H | -1.737131               | -1.547491 | 0.000000  |
| 19   | H | -4.332290               | -0.632859 | 0.888291  |
| 20   | H | -4.332290               | -0.632859 | -0.888291 |
| 21   | H | -4.001018               | -2.139656 | 0.000000  |

22 H 2.753861 -2.154348 0.875092  
23 H 2.753861 -2.154348 -0.875092  
24 H 4.301305 -1.913870 0.000000  
Point Group: cs Number of degrees of freedom: 42

Energy is -721.326035371

Hessian Updated using BFGS Update  
internal optimization with constraints (0)

42 Hessian modes will be used to form the next step

Hessian Eigenvalues:

|          |          |          |          |          |
|----------|----------|----------|----------|----------|
| 0.050683 | 0.054613 | 0.056175 | 0.073976 | 0.128445 |
| 0.129220 |          |          |          |          |
| 0.133312 | 0.150024 | 0.152524 | 0.160987 | 0.168721 |
| 0.187011 |          |          |          |          |
| 0.200643 | 0.210200 | 0.215474 | 0.218866 | 0.233117 |
| 0.234072 |          |          |          |          |
| 0.239895 | 0.255241 | 0.275258 | 0.284364 | 0.292792 |
| 0.304747 |          |          |          |          |
| 0.305418 | 0.306020 | 0.306486 | 0.308474 | 0.315141 |
| 0.319688 |          |          |          |          |
| 0.345398 | 0.375466 | 0.418989 | 0.422437 | 0.435147 |
| 0.547133 |          |          |          |          |
| 0.605040 | 0.611247 | 0.646931 | 0.807260 | 0.824178 |
| 0.849314 |          |          |          |          |

Minimum Search - Taking Simple RFO Step  
Searching for Lamda that Minimizes Along All modes  
Value Taken Lamda = -0.00000044  
Step Taken. Stepsize is 0.001606

|               | Maximum   | Tolerance | Cnvgd? |
|---------------|-----------|-----------|--------|
| Gradient      | 0.000189  | 0.000300  | YES    |
| Displacement  | 0.000583  | 0.001200  | YES    |
| Energy change | -0.000006 | 0.000001  | NO     |

#####  
# Entering anlman.exe on Sun May 20 01:28:33 2012 #  
#####

Analysis of SCF Wavefunction

Total job wall time: 3.1e+006 s

## 11b C TAUTOMER

Spartan '02 Mechanics Program: (PC/x86)  
Release 115B

Reason for exit: Successful completion  
Mechanics CPU Time : 000:00:00.1  
Mechanics Wall Time: 000:00:00.1  
Spartan '02 Quantum Mechanics Program: (PC/x86)  
Release 115B  
To use a standard Psuedopotential a heavy atom must exists  
(An atom larger than 'Ar')

Job type: Geometry optimization.  
Method: RB3LYP  
Basis set: LACVP\*  
Number of shells: 104  
Number of basis functions: 230

SCF model:  
A restricted hybrid HF-DFT SCF calculation will be  
performed using Pulay DIIS extrapolation

Optimization:

| Step | Energy       | Max Grad. | Max Dist. |
|------|--------------|-----------|-----------|
| 1    | -721.3033582 | 0.034912  | 0.089320  |
| 2    | -721.3177329 | 0.011315  | 0.040481  |
| 3    | -721.3193931 | 0.005967  | 0.019894  |
| 4    | -721.3196512 | 0.003336  | 0.010243  |
| 5    | -721.3196947 | 0.001995  | 0.002734  |
| 6    | -721.3197005 | 0.000395  | 0.001764  |
| 7    | -721.3197080 | 0.000145  | 0.000366  |

Reason for exit: Successful completion  
Quantum Mechanics Program CPU Time : 000:54:41.0  
Quantum Mechanics Program Wall Time: 000:58:32.3

Spartan '02 Properties Program: (PC/x86)  
Release 115B

Orientation rotated by 89.9999974955219 degrees!

Reason for exit: Successful completion  
Properties Program CPU Time : 000:00:00.7  
Properties Program Wall Time: 000:00:00.9

\*\* GEOMETRY OPTIMIZATION IN DELOCALIZED INTERNAL COORDINATES  
\*\*

Searching for a Minimum

Optimization Cycle: 7

|      |   | Coordinates (Angstroms) |          |          |
|------|---|-------------------------|----------|----------|
| ATOM |   | X                       | Y        | Z        |
| 1    | N | 1.733548                | 0.492020 | 0.000000 |
| 2    | C | 1.193368                | 1.867492 | 0.000000 |
| 3    | C | -0.334164               | 1.668451 | 0.000000 |

|    |   |           |           |           |
|----|---|-----------|-----------|-----------|
| 4  | C | -0.547945 | 0.249293  | 0.000000  |
| 5  | C | 0.681193  | -0.394653 | 0.000000  |
| 6  | O | 0.841959  | -1.693861 | 0.000000  |
| 7  | O | -1.166364 | 2.573064  | 0.000000  |
| 8  | C | -1.777650 | -0.528862 | 0.000000  |
| 9  | O | -1.726401 | -1.787376 | 0.000000  |
| 10 | N | -2.932189 | 0.160811  | 0.000000  |
| 11 | C | 3.124658  | 0.278444  | 0.000000  |
| 12 | C | -4.231221 | -0.490669 | 0.000000  |
| 13 | C | 3.631187  | -1.145493 | 0.000000  |
| 14 | O | 3.857376  | 1.250053  | 0.000000  |
| 15 | H | 1.532964  | 2.412464  | -0.884984 |
| 16 | H | 1.532964  | 2.412464  | 0.884984  |
| 17 | H | -0.127446 | -2.044552 | 0.000000  |
| 18 | H | -2.849994 | 1.174505  | 0.000000  |
| 19 | H | -4.353030 | -1.121959 | -0.886479 |
| 20 | H | -4.353030 | -1.121959 | 0.886479  |
| 21 | H | -5.005439 | 0.278888  | 0.000000  |
| 22 | H | 3.277313  | -1.692487 | -0.878760 |
| 23 | H | 4.721027  | -1.103591 | 0.000000  |
| 24 | H | 3.277313  | -1.692487 | 0.878760  |

Point Group: cs      Number of degrees of freedom: 42

Energy is -721.319707975

Hessian Updated using BFGS Update  
internal optimization with constraints (0)

42 Hessian modes will be used to form the next step

Hessian Eigenvalues:

|          |          |          |          |          |
|----------|----------|----------|----------|----------|
| 0.052092 | 0.054479 | 0.055874 | 0.067910 | 0.127877 |
| 0.129760 |          |          |          |          |
| 0.139082 | 0.147305 | 0.153811 | 0.167254 | 0.187332 |
| 0.194827 |          |          |          |          |
| 0.205191 | 0.210291 | 0.217587 | 0.227745 | 0.234326 |
| 0.243500 |          |          |          |          |
| 0.254040 | 0.260418 | 0.269495 | 0.284631 | 0.294569 |
| 0.304611 |          |          |          |          |
| 0.306911 | 0.307199 | 0.308508 | 0.309482 | 0.317204 |
| 0.338603 |          |          |          |          |
| 0.356988 | 0.381378 | 0.401817 | 0.416051 | 0.435479 |
| 0.481009 |          |          |          |          |
| 0.572756 | 0.714446 | 0.776144 | 0.797048 | 0.834008 |
| 0.883320 |          |          |          |          |

Minimum Search - Taking Simple RFO Step  
Searching for Lamda that Minimizes Along All modes  
Value Taken      Lamda = -0.00000015  
Step Taken.      Stepsize is 0.000829



|               | Maximum   | Tolerance | Cnvgd? |
|---------------|-----------|-----------|--------|
| Gradient      | 0.000145  | 0.000300  | YES    |
| Displacement  | 0.000366  | 0.001200  | YES    |
| Energy change | -0.000007 | 0.000001  | NO     |

```
#####
# Entering anlman.exe on Sun May 20 00:35:24 2012 #
#####
```

Analysis of SCF Wavefunction

Total job wall time: 3.5e+006 s

### 11b D TAUTOMER

Spartan '02 Mechanics Program: (PC/x86)  
Release 115B

Reason for exit: Successful completion

Mechanics CPU Time : 000:00:00.1

Mechanics Wall Time: 000:00:00.2

Spartan '02 Quantum Mechanics Program: (PC/x86)  
Release 115B

To use a standard Psuedopotential a heavy atom must exists  
(An atom larger than 'Ar')

Job type: Geometry optimization.

Method: RB3LYP

Basis set: LACVP\*

Number of shells: 104

Number of basis functions: 230

SCF model:

A restricted hybrid HF-DFT SCF calculation will be  
performed using Pulay DIIS extrapolation

Optimization:

| Step | Energy       | Max Grad. | Max Dist. |
|------|--------------|-----------|-----------|
| 1    | -721.3108607 | 0.036514  | 0.096415  |
| 2    | -721.3241343 | 0.009967  | 0.039701  |
| 3    | -721.3256070 | 0.004351  | 0.012127  |
| 4    | -721.3257747 | 0.001545  | 0.004641  |
| 5    | -721.3258006 | 0.000404  | 0.001221  |
| 6    | -721.3258019 | 0.000079  | 0.000449  |

Reason for exit: Successful completion

Quantum Mechanics Program CPU Time : 000:46:06.3

Quantum Mechanics Program Wall Time: 000:46:38.7

Spartan '02 Properties Program: (PC/x86)

Release 115B

Orientation rotated by 89.9999974955219 degrees!

Reason for exit: Successful completion

Properties Program CPU Time : 000:00:00.7

Properties Program Wall Time: 000:00:00.7

\*\* GEOMETRY OPTIMIZATION IN DELOCALIZED INTERNAL COORDINATES

\*\*

Searching for a Minimum

Optimization Cycle: 6

|      |   | Coordinates (Angstroms) |           |           |
|------|---|-------------------------|-----------|-----------|
| ATOM |   | X                       | Y         | Z         |
| 1    | N | 1.770039                | 0.442377  | 0.000000  |
| 2    | C | 1.234297                | 1.815727  | 0.000000  |
| 3    | C | -0.287608               | 1.621661  | 0.000000  |
| 4    | C | -0.505706               | 0.211847  | 0.000000  |
| 5    | C | 0.735346                | -0.506378 | 0.000000  |
| 6    | O | 0.864642                | -1.743743 | 0.000000  |
| 7    | O | -1.128713               | 2.525541  | 0.000000  |
| 8    | C | -1.745564               | -0.449080 | 0.000000  |
| 9    | O | -1.808723               | -1.770923 | 0.000000  |
| 10   | N | -2.887226               | 0.231678  | 0.000000  |
| 11   | C | 3.157220                | 0.242863  | 0.000000  |
| 12   | C | -4.209423               | -0.377768 | 0.000000  |
| 13   | C | 3.671535                | -1.178336 | 0.000000  |
| 14   | O | 3.890084                | 1.217765  | 0.000000  |
| 15   | H | 1.571020                | 2.367120  | -0.883367 |
| 16   | H | 1.571020                | 2.367120  | 0.883367  |
| 17   | H | -0.857519               | -2.097097 | 0.000000  |
| 18   | H | -2.761888               | 1.245929  | 0.000000  |
| 19   | H | -4.354981               | -1.000279 | -0.888544 |
| 20   | H | -4.354981               | -1.000279 | 0.888544  |
| 21   | H | -4.951758               | 0.421628  | 0.000000  |
| 22   | H | 3.313625                | -1.727468 | 0.875398  |
| 23   | H | 3.313625                | -1.727468 | -0.875398 |
| 24   | H | 4.761638                | -1.132438 | 0.000000  |

Point Group: cs Number of degrees of freedom: 42

Energy is -721.325801946

Hessian Updated using BFGS Update  
internal optimization with constraints (0)

42 Hessian modes will be used to form the next step

Hessian Eigenvalues:

0.050586 0.054578 0.055937 0.074504 0.128512  
0.129191

|          |          |          |          |          |
|----------|----------|----------|----------|----------|
| 0.134980 | 0.151494 | 0.155212 | 0.161002 | 0.170955 |
| 0.189399 |          |          |          |          |
| 0.201000 | 0.201719 | 0.215909 | 0.221731 | 0.232449 |
| 0.234931 |          |          |          |          |
| 0.240054 | 0.256195 | 0.274285 | 0.285822 | 0.296150 |
| 0.304843 |          |          |          |          |
| 0.305328 | 0.305593 | 0.306450 | 0.308358 | 0.320199 |
| 0.323266 |          |          |          |          |
| 0.350664 | 0.384698 | 0.420613 | 0.424210 | 0.435568 |
| 0.542090 |          |          |          |          |
| 0.570701 | 0.598031 | 0.635346 | 0.809012 | 0.830730 |
| 0.846248 |          |          |          |          |

Minimum Search - Taking Simple RFO Step  
 Searching for Lamda that Minimizes Along All modes  
 Value Taken Lamda = -0.00000024  
 Step Taken. Stepsize is 0.001245

|               | Maximum   | Tolerance | Cnvgd? |
|---------------|-----------|-----------|--------|
| Gradient      | 0.000079  | 0.000300  | YES    |
| Displacement  | 0.000449  | 0.001200  | YES    |
| Energy change | -0.000001 | 0.000001  | NO     |

#####  
 # Entering anlman.exe on Sat May 19 21:55:22 2012 #  
 #####

Analysis of SCF Wavefunction

Total job wall time: 2.8e+006 s

## 12a A TAUTOMER

Spartan '02 Mechanics Program: (PC/x86)  
 Release 115B

Reason for exit: Successful completion  
 Mechanics CPU Time : 000:00:00.2  
 Mechanics Wall Time: 000:00:00.3

Spartan '02 Quantum Mechanics Program: (PC/x86)  
 Release 115B

To use a standard Psuedopotential a heavy atom must exists  
 (An atom larger than 'Ar')

Job type: Geometry optimization.  
 Method: RB3LYP  
 Basis set: LACVP\*  
 Number of shells: 90  
 Number of basis functions: 198

SCF model:

A restricted hybrid HF-DFT SCF calculation will be performed using Pulay DIIS extrapolation

Optimization:

| Step | Energy       | Max Grad. | Max Dist. |
|------|--------------|-----------|-----------|
| 1    | -627.8197226 | 0.025385  | 0.116795  |
| 2    | -627.8272691 | 0.009268  | 0.031660  |
| 3    | -627.8279874 | 0.002559  | 0.012805  |
| 4    | -627.8280714 | 0.001132  | 0.003856  |
| 5    | -627.8280759 | 0.000537  | 0.001298  |
| 6    | -627.8280770 | 0.000073  | 0.000206  |

Reason for exit: Successful completion

Quantum Mechanics Program CPU Time : 000:33:22.7

Quantum Mechanics Program Wall Time: 000:34:01.3

Spartan '02 Properties Program: (PC/x86)

Release 115B

Orientation rotated by 179.999994991044 degrees!

Reason for exit: Successful completion

Properties Program CPU Time : 000:00:00.4

Properties Program Wall Time: 000:00:00.6

\*\* GEOMETRY OPTIMIZATION IN DELOCALIZED INTERNAL COORDINATES

\*\*

Searching for a Minimum

Optimization Cycle: 6

|      |   | Coordinates (Angstroms) |           |           |
|------|---|-------------------------|-----------|-----------|
| ATOM |   | X                       | Y         | Z         |
| 1    | N | 1.938595                | -0.382245 | 0.000000  |
| 2    | C | 1.949808                | 1.064872  | 0.000000  |
| 3    | C | 0.482368                | 1.390134  | 0.000000  |
| 4    | C | -0.266097               | 0.250265  | 0.000000  |
| 5    | C | 0.654339                | -0.920700 | 0.000000  |
| 6    | O | 0.394071                | -2.111920 | 0.000000  |
| 7    | O | 0.062570                | 2.641623  | 0.000000  |
| 8    | C | -1.716164               | 0.337180  | 0.000000  |
| 9    | O | -2.296610               | 1.432331  | 0.000000  |
| 10   | O | -2.363307               | -0.827721 | 0.000000  |
| 11   | C | 3.135488                | -1.189525 | 0.000000  |
| 12   | C | -3.799367               | -0.752094 | 0.000000  |
| 13   | H | 2.447014                | 1.486040  | 0.887163  |
| 14   | H | 2.447014                | 1.486040  | -0.887163 |
| 15   | H | -0.934870               | 2.574812  | 0.000000  |
| 16   | H | 3.748671                | -1.000490 | -0.891544 |
| 17   | H | 3.748671                | -1.000490 | 0.891544  |
| 18   | H | 2.818598                | -2.234445 | 0.000000  |
| 19   | H | -4.155826               | -0.228112 | -0.890570 |

20 H -4.139140 -1.787442 0.000000  
21 H -4.155826 -0.228112 0.890570  
Point Group: cs Number of degrees of freedom: 36

Energy is -627.828077004

Hessian Updated using BFGS Update  
internal optimization with constraints (0)

36 Hessian modes will be used to form the next step

Hessian Eigenvalues:  
0.052994 0.056066 0.071394 0.073717 0.122326  
0.130845  
0.163608 0.167895 0.174458 0.187371 0.201429  
0.208767  
0.221675 0.227165 0.233493 0.257927 0.275572  
0.285563  
0.288059 0.301465 0.305720 0.306454 0.307020  
0.308272  
0.309420 0.333076 0.340654 0.348708 0.359480  
0.400755  
0.466605 0.489248 0.522195 0.688729 0.814988  
0.863556

Minimum Search - Taking Simple RFO Step  
Searching for Lamda that Minimizes Along All modes  
Value Taken Lamda = -0.00000009  
Step Taken. Stepsize is 0.000574

|               | Maximum   | Tolerance | Cnvgd? |
|---------------|-----------|-----------|--------|
| Gradient      | 0.000073  | 0.000300  | YES    |
| Displacement  | 0.000206  | 0.001200  | YES    |
| Energy change | -0.000001 | 0.000001  | NO     |

#####  
# Entering anlman.exe on Mon May 21 07:05:29 2012 #  
#####

Analysis of SCF Wavefunction

Total job wall time: 2e+006 s

## 12a B TAUTOMER

Spartan '02 Mechanics Program: (PC/x86)  
Release 115B

Reason for exit: Successful completion  
Mechanics CPU Time : 000:00:00.1

Mechanics Wall Time: 000:00:00.1  
Spartan '02 Quantum Mechanics Program: (PC/x86)  
Release 115B  
To use a standard Psuedopotential a heavy atom must exists  
(An atom larger than 'Ar')

Job type: Geometry optimization.  
Method: RB3LYP  
Basis set: LACVP\*  
Number of shells: 90  
Number of basis functions: 198

SCF model:  
A restricted hybrid HF-DFT SCF calculation will be  
performed using Pulay DIIS extrapolation

Optimization:

| Step | Energy       | Max Grad. | Max Dist. |
|------|--------------|-----------|-----------|
| 1    | -627.8026907 | 0.051123  | 0.144796  |
| 2    | -627.8174031 | 0.013123  | 0.053666  |
| 3    | -627.8191965 | 0.006469  | 0.019339  |
| 4    | -627.8195192 | 0.002610  | 0.011144  |
| 5    | -627.8195688 | 0.001111  | 0.003774  |
| 6    | -627.8195812 | 0.000265  | 0.001072  |

Reason for exit: Successful completion  
Quantum Mechanics Program CPU Time : 000:33:38.9  
Quantum Mechanics Program Wall Time: 000:33:58.7

Spartan '02 Properties Program: (PC/x86)  
Release 115B  
Orientation rotated by 89.9999974955219 degrees!

Reason for exit: Successful completion  
Properties Program CPU Time : 000:00:00.5  
Properties Program Wall Time: 000:00:00.5

\*\* GEOMETRY OPTIMIZATION IN DELOCALIZED INTERNAL COORDINATES  
\*\*

Searching for a Minimum

Optimization Cycle: 6

|      |   | Coordinates (Angstroms) |           |          |
|------|---|-------------------------|-----------|----------|
| ATOM |   | X                       | Y         | Z        |
| 1    | N | 1.979021                | -0.321603 | 0.000000 |
| 2    | C | 1.954366                | 1.128483  | 0.000000 |
| 3    | C | 0.464571                | 1.449023  | 0.000000 |
| 4    | C | -0.239189               | 0.212876  | 0.000000 |
| 5    | C | 0.718979                | -0.911521 | 0.000000 |
| 6    | O | 0.506987                | -2.115050 | 0.000000 |
| 7    | O | -0.029667               | 2.596317  | 0.000000 |
| 8    | C | -1.628152               | 0.231407  | 0.000000 |

|    |   |           |           |           |
|----|---|-----------|-----------|-----------|
| 9  | O | -2.278135 | 1.375120  | 0.000000  |
| 10 | O | -2.342008 | -0.872796 | 0.000000  |
| 11 | C | 3.200949  | -1.090164 | 0.000000  |
| 12 | C | -3.779613 | -0.759885 | 0.000000  |
| 13 | H | 2.440449  | 1.560351  | -0.887436 |
| 14 | H | 2.440449  | 1.560351  | 0.887436  |
| 15 | H | -1.563135 | 2.111919  | 0.000000  |
| 16 | H | 3.807653  | -0.877817 | 0.890970  |
| 17 | H | 2.921528  | -2.145585 | 0.000000  |
| 18 | H | 3.807653  | -0.877817 | -0.890970 |
| 19 | H | -4.122204 | -0.232683 | 0.893403  |
| 20 | H | -4.122204 | -0.232683 | -0.893403 |
| 21 | H | -4.138299 | -1.788245 | 0.000000  |

Point Group: cs    Number of degrees of freedom: 36

Energy is -627.819581248

Hessian Updated using BFGS Update  
internal optimization with constraints (0)

36 Hessian modes will be used to form the next step

Hessian Eigenvalues:

|          |          |          |          |          |
|----------|----------|----------|----------|----------|
| 0.052836 | 0.056231 | 0.070661 | 0.075666 | 0.124875 |
| 0.131939 |          |          |          |          |
| 0.134778 | 0.168481 | 0.169766 | 0.171682 | 0.195052 |
| 0.201156 |          |          |          |          |
| 0.212630 | 0.222328 | 0.230973 | 0.246609 | 0.259947 |
| 0.266532 |          |          |          |          |
| 0.285422 | 0.289791 | 0.304119 | 0.304401 | 0.306692 |
| 0.307523 |          |          |          |          |
| 0.309628 | 0.311013 | 0.323544 | 0.364856 | 0.376448 |
| 0.392704 |          |          |          |          |
| 0.474822 | 0.563732 | 0.591853 | 0.787348 | 0.849346 |
| 0.870485 |          |          |          |          |

Minimum Search - Taking Simple RFO Step  
Searching for Lamda that Minimizes Along All modes  
Value Taken    Lamda = -0.00000155  
Step Taken.    Stepsize is 0.002558

|               | Maximum   | Tolerance | Cnvgd? |
|---------------|-----------|-----------|--------|
| Gradient      | 0.000265  | 0.000300  | YES    |
| Displacement  | 0.001072  | 0.001200  | YES    |
| Energy change | -0.000012 | 0.000001  | NO     |

#####  
# Entering anlman.exe on Sun May 20 05:00:29 2012 #  
#####

Analysis of SCF Wavefunction

## 12a C TAUTOMER

Spartan '02 Mechanics Program: (PC/x86)  
Release 115B

Reason for exit: Successful completion  
Mechanics CPU Time : 000:00:00.1  
Mechanics Wall Time: 000:00:00.2  
Spartan '02 Quantum Mechanics Program: (PC/x86)  
Release 115B

To use a standard Psuedopotential a heavy atom must exists  
(An atom larger than 'Ar')

Job type: Geometry optimization.  
Method: RB3LYP  
Basis set: LACVP\*  
Number of shells: 90  
Number of basis functions: 198

SCF model:

A restricted hybrid HF-DFT SCF calculation will be  
performed using Pulay DIIS extrapolation

Optimization:

| Step | Energy       | Max Grad. | Max Dist. |
|------|--------------|-----------|-----------|
| 1    | -627.8096298 | 0.043585  | 0.125322  |
| 2    | -627.8231459 | 0.011491  | 0.046944  |
| 3    | -627.8244373 | 0.004708  | 0.015806  |
| 4    | -627.8245822 | 0.004207  | 0.007997  |
| 5    | -627.8246200 | 0.000566  | 0.001812  |
| 6    | -627.8246243 | 0.000207  | 0.000516  |

Reason for exit: Successful completion  
Quantum Mechanics Program CPU Time : 000:34:04.1  
Quantum Mechanics Program Wall Time: 000:34:34.8

Spartan '02 Properties Program: (PC/x86)  
Release 115B

Orientation rotated by 89.9999974955219 degrees!

Reason for exit: Successful completion  
Properties Program CPU Time : 000:00:00.5  
Properties Program Wall Time: 000:00:00.7

\*\* GEOMETRY OPTIMIZATION IN DELOCALIZED INTERNAL COORDINATES  
\*\*

Searching for a Minimum

Optimization Cycle: 6



Coordinates (Angstroms)

| ATOM | X         | Y         | Z         |
|------|-----------|-----------|-----------|
| 1 N  | 1.972316  | -0.003160 | 0.000000  |
| 2 C  | 1.742298  | 1.441832  | 0.000000  |
| 3 C  | 0.189638  | 1.587075  | 0.000000  |
| 4 C  | -0.315626 | 0.229497  | 0.000000  |
| 5 C  | 0.792649  | -0.638905 | 0.000000  |
| 6 O  | 0.747034  | -1.953154 | 0.000000  |
| 7 O  | -0.375085 | 2.667223  | 0.000000  |
| 8 C  | -1.634156 | -0.342024 | 0.000000  |
| 9 O  | -1.822400 | -1.574865 | 0.000000  |
| 10 O | -2.644237 | 0.533476  | 0.000000  |
| 11 C | 3.268885  | -0.659275 | 0.000000  |
| 12 C | -3.965340 | -0.030009 | 0.000000  |
| 13 H | 2.170857  | 1.915737  | -0.890658 |
| 14 H | 2.170857  | 1.915737  | 0.890658  |
| 15 H | -0.242358 | -2.161809 | 0.000000  |
| 16 H | 3.394104  | -1.286976 | -0.889132 |
| 17 H | 4.043813  | 0.109484  | 0.000000  |
| 18 H | 3.394104  | -1.286976 | 0.889132  |
| 19 H | -4.640371 | 0.825957  | 0.000000  |
| 20 H | -4.123492 | -0.644433 | -0.890284 |
| 21 H | -4.123492 | -0.644433 | 0.890284  |

Point Group: cs      Number of degrees of freedom: 36

Energy is    -627.824624343

Hessian Updated using BFGS Update  
 internal optimization with constraints (0)

36 Hessian modes will be used to form the next step

Hessian Eigenvalues:

|          |          |          |          |          |
|----------|----------|----------|----------|----------|
| 0.052539 | 0.055287 | 0.067300 | 0.073355 | 0.122118 |
| 0.130548 |          |          |          |          |
| 0.163856 | 0.169524 | 0.170162 | 0.178110 | 0.187015 |
| 0.208028 |          |          |          |          |
| 0.225261 | 0.227551 | 0.234060 | 0.256560 | 0.277472 |
| 0.286270 |          |          |          |          |
| 0.292916 | 0.302916 | 0.305224 | 0.305743 | 0.306376 |
| 0.307715 |          |          |          |          |
| 0.315827 | 0.341357 | 0.353567 | 0.367206 | 0.386008 |
| 0.424947 |          |          |          |          |
| 0.435969 | 0.498045 | 0.528106 | 0.733717 | 0.822942 |
| 0.855689 |          |          |          |          |

Minimum Search - Taking Simple RFO Step  
 Searching for Lamda that Minimizes Along All modes  
 Value Taken    Lamda = -0.00000048  
 Step Taken.    Stepsize is 0.001284

|               | Maximum   | Tolerance | Cnvgd? |
|---------------|-----------|-----------|--------|
| Gradient      | 0.000207  | 0.000300  | YES    |
| Displacement  | 0.000516  | 0.001200  | YES    |
| Energy change | -0.000004 | 0.000001  | NO     |

```
#####
# Entering anlman.exe on Sun May 20 04:25:26 2012 #
#####
```

Analysis of SCF Wavefunction

Total job wall time: 2.1e+006 s

## 12a D TAUTOMER

Spartan '02 Mechanics Program: (PC/x86)  
Release 115B

Reason for exit: Successful completion  
Mechanics CPU Time : 000:00:00.2  
Mechanics Wall Time: 000:00:00.2

Spartan '02 Quantum Mechanics Program: (PC/x86)  
Release 115B

To use a standard Psuedopotential a heavy atom must exists  
(An atom larger than 'Ar')

Job type: Geometry optimization.  
Method: RB3LYP  
Basis set: LACVP\*  
Number of shells: 90  
Number of basis functions: 198

SCF model:

A restricted hybrid HF-DFT SCF calculation will be  
performed using Pulay DIIS extrapolation

Optimization:

| Step | Energy       | Max Grad. | Max Dist. |
|------|--------------|-----------|-----------|
| 1    | -627.8047267 | 0.050776  | 0.142958  |
| 2    | -627.8199879 | 0.019256  | 0.057535  |
| 3    | -627.8219336 | 0.008723  | 0.022299  |
| 4    | -627.8222923 | 0.002632  | 0.012604  |
| 5    | -627.8223695 | 0.000885  | 0.003808  |
| 6    | -627.8223734 | 0.000400  | 0.001755  |
| 7    | -627.8223743 | 0.000099  | 0.000422  |

Reason for exit: Successful completion

Quantum Mechanics Program CPU Time : 000:37:01.5

Quantum Mechanics Program Wall Time: 000:37:43.9

Spartan '02 Properties Program: (PC/x86)  
Release 115B

Orientation rotated by 89.9999974955219 degrees!  
Reason for exit: Successful completion  
Properties Program CPU Time : 000:00:00.5  
Properties Program Wall Time: 000:00:00.6

\*\* GEOMETRY OPTIMIZATION IN DELOCALIZED INTERNAL COORDINATES  
\*\*

Searching for a Minimum

Optimization Cycle: 7

|      |   | Coordinates (Angstroms) |           |           |
|------|---|-------------------------|-----------|-----------|
| ATOM |   | X                       | Y         | Z         |
| 1    | N | 1.993750                | -0.073081 | 0.000000  |
| 2    | C | 1.817724                | 1.372978  | 0.000000  |
| 3    | C | 0.279588                | 1.579745  | 0.000000  |
| 4    | C | -0.276687               | 0.242032  | 0.000000  |
| 5    | C | 0.804007                | -0.732927 | 0.000000  |
| 6    | O | 0.660693                | -1.979211 | 0.000000  |
| 7    | O | -0.255063               | 2.675371  | 0.000000  |
| 8    | C | -1.581797               | -0.225156 | 0.000000  |
| 9    | O | -1.842019               | -1.513936 | 0.000000  |
| 10   | O | -2.607878               | 0.601768  | 0.000000  |
| 11   | C | 3.283183                | -0.727548 | 0.000000  |
| 12   | C | -3.934256               | 0.038606  | 0.000000  |
| 13   | H | 2.264195                | 1.839033  | -0.888406 |
| 14   | H | 2.264195                | 1.839033  | 0.888406  |
| 15   | H | -0.923055               | -1.983950 | 0.000000  |
| 16   | H | 3.862968                | -0.452893 | -0.890611 |
| 17   | H | 3.862968                | -0.452893 | 0.890611  |
| 18   | H | 3.114943                | -1.805930 | 0.000000  |
| 19   | H | -4.601312               | 0.899820  | 0.000000  |
| 20   | H | -4.093074               | -0.570432 | -0.893084 |
| 21   | H | -4.093074               | -0.570432 | 0.893084  |

Point Group: cs Number of degrees of freedom: 36

Energy is -627.822374316

Hessian Updated using BFGS Update  
internal optimization with constraints (0)

36 Hessian modes will be used to form the next step

Hessian Eigenvalues:  
0.052360 0.056146 0.071671 0.075526 0.124610  
0.129119  
0.131520 0.164593 0.170317 0.172341 0.192514  
0.206383

|          |          |          |          |          |
|----------|----------|----------|----------|----------|
| 0.208965 | 0.217502 | 0.227339 | 0.241930 | 0.249711 |
| 0.260839 |          |          |          |          |
| 0.285305 | 0.293983 | 0.302504 | 0.304684 | 0.306401 |
| 0.307676 |          |          |          |          |
| 0.309849 | 0.312836 | 0.331040 | 0.355012 | 0.374657 |
| 0.411729 |          |          |          |          |
| 0.479748 | 0.564567 | 0.628788 | 0.809205 | 0.859283 |
| 0.871055 |          |          |          |          |

Minimum Search - Taking Simple RFO Step  
 Searching for Lamda that Minimizes Along All modes  
 Value Taken Lamda = -0.00000016  
 Step Taken. Stepsize is 0.000886

|               | Maximum   | Tolerance | Cnvgd? |
|---------------|-----------|-----------|--------|
| Gradient      | 0.000099  | 0.000300  | YES    |
| Displacement  | 0.000422  | 0.001200  | YES    |
| Energy change | -0.000001 | 0.000001  | YES    |

#####  
 # Entering anlman.exe on Sun May 20 03:49:51 2012 #  
 #####

Analysis of SCF Wavefunction

Total job wall time: 2.3e+006 s

## 12b A TAUTOMER

Spartan '02 Mechanics Program: (PC/x86)  
 Release 115B

Reason for exit: Successful completion  
 Mechanics CPU Time : 000:00:00.1  
 Mechanics Wall Time: 000:00:00.1

Spartan '02 Quantum Mechanics Program: (PC/x86)  
 Release 115B

To use a standard Psuedopotential a heavy atom must exists  
 (An atom larger than 'Ar')

Job type: Geometry optimization.  
 Method: RB3LYP  
 Basis set: LACVP\*  
 Number of shells: 102  
 Number of basis functions: 228

SCF model:  
 A restricted hybrid HF-DFT SCF calculation will be  
 performed using Pulay DIIS extrapolation

Optimization:

| Step | Energy       | Max Grad. | Max Dist. |
|------|--------------|-----------|-----------|
| 1    | -741.1674797 | 0.033171  | 0.128301  |
| 2    | -741.1764991 | 0.009202  | 0.028039  |
| 3    | -741.1773037 | 0.002734  | 0.009530  |
| 4    | -741.1773840 | 0.001031  | 0.003231  |
| 5    | -741.1773947 | 0.000449  | 0.001509  |
| 6    | -741.1773927 | 0.000083  | 0.002802  |
| 7    | -741.1773938 | 0.000042  | 0.002079  |
| 8    | -741.1773947 | 0.000044  | 0.000193  |

Reason for exit: Successful completion

Quantum Mechanics Program CPU Time : 000:41:30.4

Quantum Mechanics Program Wall Time: 000:41:55.8

Spartan '02 Properties Program: (PC/x86)

Release 115B

Orientation rotated by 179.999994991044 degrees!

Reason for exit: Successful completion

Properties Program CPU Time : 000:00:00.6

Properties Program Wall Time: 000:00:00.6

\*\* GEOMETRY OPTIMIZATION IN DELOCALIZED INTERNAL COORDINATES

\*\*

Searching for a Minimum

Optimization Cycle: 8

|      |   | Coordinates (Angstroms) |           |           |
|------|---|-------------------------|-----------|-----------|
| ATOM |   | X                       | Y         | Z         |
| 1    | N | 1.647789                | 0.259117  | -0.000015 |
| 2    | C | 1.365409                | 1.693397  | 0.000044  |
| 3    | C | -0.130732               | 1.717536  | -0.000006 |
| 4    | C | -0.650996               | 0.453047  | -0.000080 |
| 5    | C | 0.455433                | -0.523824 | -0.000094 |
| 6    | O | 0.413269                | -1.737247 | -0.000182 |
| 7    | O | -0.787264               | 2.857476  | 0.000028  |
| 8    | C | -2.093978               | 0.259808  | -0.000122 |
| 9    | O | -2.868677               | 1.225690  | -0.000332 |
| 10   | O | -2.505018               | -1.005504 | 0.000127  |
| 11   | C | 2.983058                | -0.161660 | 0.000056  |
| 12   | C | -3.930756               | -1.208452 | 0.000102  |
| 13   | C | 3.262413                | -1.645441 | -0.000019 |
| 14   | O | 3.861216                | 0.686217  | 0.000188  |
| 15   | H | 1.785662                | 2.189170  | 0.882623  |
| 16   | H | 1.785726                | 2.189251  | -0.882458 |
| 17   | H | -1.754409               | 2.601206  | -0.000039 |
| 18   | H | -4.379602               | -0.762892 | -0.891051 |
| 19   | H | -4.063394               | -2.289821 | 0.000295  |
| 20   | H | -4.379676               | -0.762563 | 0.891053  |
| 21   | H | 2.819318                | -2.129845 | 0.874496  |

22 H 2.819385 -2.129744 -0.874624  
23 H 4.345825 -1.774922 0.000009  
Point Group: c1 Number of degrees of freedom: 63

Energy is -741.177394694

Hessian Updated using BFGS Update  
internal optimization with constraints (0)

63 Hessian modes will be used to form the next step

Hessian Eigenvalues:

|          |          |          |          |          |
|----------|----------|----------|----------|----------|
| 0.001217 | 0.001855 | 0.004788 | 0.006954 | 0.008917 |
| 0.013630 |          |          |          |          |
| 0.014707 | 0.016688 | 0.017941 | 0.021617 | 0.028454 |
| 0.037869 |          |          |          |          |
| 0.044156 | 0.051300 | 0.054304 | 0.055285 | 0.055839 |
| 0.064094 |          |          |          |          |
| 0.073472 | 0.074551 | 0.076415 | 0.096498 | 0.122129 |
| 0.128392 |          |          |          |          |
| 0.147969 | 0.150825 | 0.166107 | 0.169468 | 0.176281 |
| 0.182830 |          |          |          |          |
| 0.186001 | 0.199181 | 0.211768 | 0.215132 | 0.229340 |
| 0.241369 |          |          |          |          |
| 0.243419 | 0.259385 | 0.273933 | 0.280443 | 0.285702 |
| 0.296180 |          |          |          |          |
| 0.304598 | 0.305229 | 0.305467 | 0.305788 | 0.306029 |
| 0.306725 |          |          |          |          |
| 0.307411 | 0.307420 | 0.311098 | 0.341966 | 0.349063 |
| 0.363231 |          |          |          |          |
| 0.415959 | 0.457555 | 0.490336 | 0.532470 | 0.586210 |
| 0.675908 |          |          |          |          |
| 0.801836 | 0.811903 | 0.856555 |          |          |

Minimum Search - Taking Simple RFO Step  
Searching for Lamda that Minimizes Along All modes  
Value Taken Lamda = -0.00000003  
Step Taken. Stepsize is 0.000598

|               | Maximum   | Tolerance | Cnvgd? |
|---------------|-----------|-----------|--------|
| Gradient      | 0.000044  | 0.000300  | YES    |
| Displacement  | 0.000193  | 0.001200  | YES    |
| Energy change | -0.000001 | 0.000001  | YES    |

#####  
# Entering anlman.exe on Tue May 22 07:55:47 2012 #  
#####

Analysis of SCF Wavefunction

Total job wall time: 2.5e+006 s

## 12b B TAUTOMER

Spartan '02 Mechanics Program: (PC/x86)  
Release 115B

Reason for exit: Successful completion

Mechanics CPU Time : 000:00:00.1

Mechanics Wall Time: 000:00:00.1

Spartan '02 Quantum Mechanics Program: (PC/x86)  
Release 115B

To use a standard Psuedopotential a heavy atom must exists  
(An atom larger than 'Ar')

Job type: Geometry optimization.

Method: RB3LYP

Basis set: LACVP\*

Number of shells: 102

Number of basis functions: 228

SCF model:

A restricted hybrid HF-DFT SCF calculation will be  
performed using Pulay DIIS extrapolation

Optimization:

| Step | Energy       | Max Grad. | Max Dist. |
|------|--------------|-----------|-----------|
| 1    | -741.1503465 | 0.052493  | 0.144245  |
| 2    | -741.1662310 | 0.013680  | 0.041460  |
| 3    | -741.1680629 | 0.007174  | 0.021750  |
| 4    | -741.1683874 | 0.002757  | 0.013853  |
| 5    | -741.1684544 | 0.001281  | 0.005085  |
| 6    | -741.1684670 | 0.000431  | 0.001458  |
| 7    | -741.1684682 | 0.000070  | 0.000201  |

Reason for exit: Successful completion

Quantum Mechanics Program CPU Time : 000:49:54.0

Quantum Mechanics Program Wall Time: 000:50:40.5

Spartan '02 Properties Program: (PC/x86)  
Release 115B

Orientation rotated by 89.9999974955219 degrees!

Reason for exit: Successful completion

Properties Program CPU Time : 000:00:00.7

Properties Program Wall Time: 000:00:00.9

\*\* GEOMETRY OPTIMIZATION IN DELOCALIZED INTERNAL COORDINATES  
\*\*

Searching for a Minimum

Optimization Cycle: 7

| Coordinates (Angstroms) |   |           |           |           |
|-------------------------|---|-----------|-----------|-----------|
| ATOM                    |   | X         | Y         | Z         |
| 1                       | N | 1.669146  | 0.295325  | 0.000000  |
| 2                       | C | 1.363475  | 1.729778  | 0.000000  |
| 3                       | C | -0.151503 | 1.763041  | 0.000000  |
| 4                       | C | -0.622677 | 0.419039  | 0.000000  |
| 5                       | C | 0.500538  | -0.520573 | 0.000000  |
| 6                       | O | 0.490801  | -1.737560 | 0.000000  |
| 7                       | O | -0.855570 | 2.794275  | 0.000000  |
| 8                       | C | -1.997862 | 0.187354  | 0.000000  |
| 9                       | O | -2.834740 | 1.195671  | 0.000000  |
| 10                      | O | -2.498179 | -1.024590 | 0.000000  |
| 11                      | C | 3.011507  | -0.101908 | 0.000000  |
| 12                      | C | -3.935417 | -1.174025 | 0.000000  |
| 13                      | C | 3.323458  | -1.580150 | 0.000000  |
| 14                      | O | 3.875890  | 0.760588  | 0.000000  |
| 15                      | H | 1.777568  | 2.229458  | -0.882404 |
| 16                      | H | 1.777568  | 2.229458  | 0.882404  |
| 17                      | H | -2.256891 | 2.051555  | 0.000000  |
| 18                      | H | -4.364798 | -0.716233 | -0.893787 |
| 19                      | H | -4.100763 | -2.250191 | 0.000000  |
| 20                      | H | -4.364798 | -0.716233 | 0.893787  |
| 21                      | H | 2.891774  | -2.074780 | 0.874360  |
| 22                      | H | 2.891774  | -2.074780 | -0.874360 |
| 23                      | H | 4.409699  | -1.684520 | 0.000000  |

Point Group: cs    Number of degrees of freedom: 40

Energy is -741.168468236

Hessian Updated using BFGS Update  
 internal optimization with constraints (0)

40 Hessian modes will be used to form the next step

Hessian Eigenvalues:

|          |          |          |          |          |
|----------|----------|----------|----------|----------|
| 0.050755 | 0.056001 | 0.073878 | 0.075686 | 0.125084 |
| 0.128347 |          |          |          |          |
| 0.129873 | 0.152817 | 0.161654 | 0.171025 | 0.172149 |
| 0.194800 |          |          |          |          |
| 0.203963 | 0.214973 | 0.232089 | 0.234337 | 0.236113 |
| 0.251072 |          |          |          |          |
| 0.257105 | 0.279808 | 0.280415 | 0.287861 | 0.303649 |
| 0.305207 |          |          |          |          |
| 0.305650 | 0.307152 | 0.308287 | 0.317231 | 0.320475 |
| 0.364806 |          |          |          |          |
| 0.392777 | 0.414562 | 0.457128 | 0.578729 | 0.610294 |
| 0.615740 |          |          |          |          |
| 0.797565 | 0.811343 | 0.856214 | 0.873977 |          |

Minimum Search - Taking Simple RFO Step



Searching for Lamda that Minimizes Along All modes  
Value Taken Lamda = -0.00000008  
Step Taken. Stepsize is 0.000557

|               | Maximum   | Tolerance | Cnvgd? |
|---------------|-----------|-----------|--------|
| Gradient      | 0.000070  | 0.000300  | YES    |
| Displacement  | 0.000201  | 0.001200  | YES    |
| Energy change | -0.000001 | 0.000001  | NO     |

```
#####  
# Entering anlman.exe on Sun May 20 09:19:56 2012 #  
#####
```

Analysis of SCF Wavefunction

Total job wall time: 3e+006 s

## 12b C TAUTOMER

Spartan '02 Mechanics Program: (PC/x86)  
Release 115B

Reason for exit: Successful completion

Mechanics CPU Time : 000:00:00.1

Mechanics Wall Time: 000:00:00.2

Spartan '02 Quantum Mechanics Program: (PC/x86)  
Release 115B

To use a standard Psuedopotential a heavy atom must exists  
(An atom larger than 'Ar')

Job type: Geometry optimization.

Method: RB3LYP

Basis set: LACVP\*

Number of shells: 102

Number of basis functions: 228

SCF model:

A restricted hybrid HF-DFT SCF calculation will be  
performed using Pulay DIIS extrapolation

Optimization:

| Step | Energy       | Max Grad. | Max Dist. |
|------|--------------|-----------|-----------|
| 1    | -741.1450738 | 0.036836  | 0.129532  |
| 2    | -741.1603094 | 0.013328  | 0.048885  |
| 3    | -741.1621251 | 0.003855  | 0.014685  |
| 4    | -741.1623188 | 0.002042  | 0.005652  |
| 5    | -741.1623338 | 0.001410  | 0.002419  |
| 6    | -741.1623422 | 0.000142  | 0.000820  |

Reason for exit: Sucessful completion

Quantum Mechanics Program CPU Time : 000:43:16.4  
Quantum Mechanics Program Wall Time: 000:43:47.5

Spartan '02 Properties Program: (PC/x86)  
Release 115B

Orientation rotated by 89.9999974955219 degrees!

Reason for exit: Successful completion

Properties Program CPU Time : 000:00:00.6

Properties Program Wall Time: 000:00:00.7

\*\* GEOMETRY OPTIMIZATION IN DELOCALIZED INTERNAL COORDINATES  
\*\*

Searching for a Minimum

Optimization Cycle: 6

|      |   | Coordinates (Angstroms) |           |           |
|------|---|-------------------------|-----------|-----------|
| ATOM |   | X                       | Y         | Z         |
| 1    | N | 1.501701                | -0.226595 | 0.000000  |
| 2    | C | 1.323387                | 1.236774  | 0.000000  |
| 3    | C | -0.211749               | 1.449081  | 0.000000  |
| 4    | C | -0.782291               | 0.116785  | 0.000000  |
| 5    | C | 0.256696                | -0.818463 | 0.000000  |
| 6    | O | 0.114626                | -2.114239 | 0.000000  |
| 7    | O | -0.728105               | 2.551010  | 0.000000  |
| 8    | C | -2.148812               | -0.357836 | 0.000000  |
| 9    | O | -2.425643               | -1.569335 | 0.000000  |
| 10   | O | -3.081246               | 0.594115  | 0.000000  |
| 11   | C | 2.747329                | -0.896885 | 0.000000  |
| 12   | C | -4.446843               | 0.140969  | 0.000000  |
| 13   | C | 3.958331                | 0.017623  | 0.000000  |
| 14   | O | 2.830154                | -2.105027 | 0.000000  |
| 15   | H | 1.766380                | 1.693310  | -0.890110 |
| 16   | H | 1.766380                | 1.693310  | 0.890110  |
| 17   | H | -0.885213               | -2.255821 | 0.000000  |
| 18   | H | -5.047430               | 1.050261  | 0.000000  |
| 19   | H | -4.652016               | -0.457834 | -0.890884 |
| 20   | H | -4.652016               | -0.457834 | 0.890884  |
| 21   | H | 3.974293                | 0.664745  | 0.884181  |
| 22   | H | 4.847792                | -0.612862 | 0.000000  |
| 23   | H | 3.974293                | 0.664745  | -0.884181 |

Point Group: cs Number of degrees of freedom: 40

Energy is -741.162342181

Hessian Updated using BFGS Update  
internal optimization with constraints (0)

40 Hessian modes will be used to form the next step

Hessian Eigenvalues:

|          |          |          |          |          |
|----------|----------|----------|----------|----------|
| 0.051303 | 0.054956 | 0.068885 | 0.073387 | 0.122163 |
| 0.129109 |          |          |          |          |
| 0.152342 | 0.170148 | 0.174695 | 0.180318 | 0.197616 |
| 0.208309 |          |          |          |          |
| 0.215447 | 0.225991 | 0.230649 | 0.238333 | 0.244256 |
| 0.253523 |          |          |          |          |
| 0.271320 | 0.279828 | 0.289447 | 0.295461 | 0.305096 |
| 0.305767 |          |          |          |          |
| 0.306807 | 0.307358 | 0.310350 | 0.324279 | 0.337459 |
| 0.342455 |          |          |          |          |
| 0.415601 | 0.460079 | 0.492472 | 0.504449 | 0.560668 |
| 0.602682 |          |          |          |          |
| 0.786431 | 0.815408 | 0.831925 | 0.846594 |          |

Minimum Search - Taking Simple RFO Step  
 Searching for Lamda that Minimizes Along All modes  
 Value Taken Lamda = -0.00000038  
 Step Taken. Stepsize is 0.001470

|               | Maximum   | Tolerance | Cnvgd? |
|---------------|-----------|-----------|--------|
| Gradient      | 0.000142  | 0.000300  | YES    |
| Displacement  | 0.000820  | 0.001200  | YES    |
| Energy change | -0.000008 | 0.000001  | NO     |

#####  
 # Entering anlman.exe on Sun May 20 08:28:19 2012 #  
 #####

Analysis of SCF Wavefunction

Total job wall time: 2.6e+006 s

## 12b D TAUTOMER

Spartan '02 Mechanics Program: (PC/x86)  
 Release 115B

Reason for exit: Successful completion  
 Mechanics CPU Time : 000:00:00.3  
 Mechanics Wall Time: 000:00:00.3

Spartan '02 Quantum Mechanics Program: (PC/x86)  
 Release 115B

To use a standard Psuedopotential a heavy atom must exists  
 (An atom larger than 'Ar')

Job type: Geometry optimization.  
 Method: RB3LYP  
 Basis set: LACVP\*  
 Number of shells: 102

Number of basis functions: 228

SCF model:

A restricted hybrid HF-DFT SCF calculation will be performed using Pulay DIIS extrapolation

Optimization:

| Step | Energy       | Max Grad. | Max Dist. |
|------|--------------|-----------|-----------|
| 1    | -741.1491326 | 0.052301  | 0.143188  |
| 2    | -741.1652810 | 0.013337  | 0.041945  |
| 3    | -741.1671069 | 0.005876  | 0.016421  |
| 4    | -741.1673897 | 0.002968  | 0.009496  |
| 5    | -741.1674386 | 0.000850  | 0.002454  |
| 6    | -741.1674457 | 0.000249  | 0.000870  |

Reason for exit: Successful completion

Quantum Mechanics Program CPU Time : 000:46:03.0

Quantum Mechanics Program Wall Time: 000:46:51.1

Spartan '02 Properties Program: (PC/x86)

Release 115B

Orientation rotated by 89.9999974955219 degrees!

Reason for exit: Successful completion

Properties Program CPU Time : 000:00:00.8

Properties Program Wall Time: 000:00:01.0

\*\* GEOMETRY OPTIMIZATION IN DELOCALIZED INTERNAL COORDINATES

\*\*

Searching for a Minimum

Optimization Cycle: 6

|      |   | Coordinates (Angstroms) |           |           |
|------|---|-------------------------|-----------|-----------|
| ATOM |   | X                       | Y         | Z         |
| 1    | N | 1.632642                | 0.472492  | 0.000000  |
| 2    | C | 1.197822                | 1.878034  | 0.000000  |
| 3    | C | -0.341395               | 1.811961  | 0.000000  |
| 4    | C | -0.667754               | 0.395816  | 0.000000  |
| 5    | C | 0.542373                | -0.392665 | 0.000000  |
| 6    | O | 0.599224                | -1.639736 | 0.000000  |
| 7    | O | -1.066503               | 2.790348  | 0.000000  |
| 8    | C | -1.893073               | -0.263313 | 0.000000  |
| 9    | O | -1.962561               | -1.575807 | 0.000000  |
| 10   | O | -3.023284               | 0.404659  | 0.000000  |
| 11   | C | 3.006546                | 0.169948  | 0.000000  |
| 12   | C | -4.261890               | -0.336768 | 0.000000  |
| 13   | C | 3.421830                | -1.282813 | 0.000000  |
| 14   | O | 3.803079                | 1.091484  | 0.000000  |
| 15   | H | 1.572622                | 2.402840  | -0.883821 |
| 16   | H | 1.572622                | 2.402840  | 0.883821  |

```

17 H      -0.996379   -1.910883    0.000000
18 H      -4.332879   -0.960409    0.893903
19 H      -5.039495    0.425511    0.000000
20 H      -4.332879   -0.960409   -0.893903
21 H       3.028413   -1.806417    0.875796
22 H       3.028413   -1.806417   -0.875796
23 H       4.512505   -1.310296    0.000000
Point Group: cs      Number of degrees of freedom: 40

```

Energy is -741.167445698

Hessian Updated using BFGS Update  
internal optimization with constraints (0)

40 Hessian modes will be used to form the next step

Hessian Eigenvalues:

|          |          |          |          |          |
|----------|----------|----------|----------|----------|
| 0.050649 | 0.055980 | 0.074991 | 0.075656 | 0.125061 |
| 0.128543 |          |          |          |          |
| 0.147487 | 0.151569 | 0.169563 | 0.171516 | 0.176625 |
| 0.195465 |          |          |          |          |
| 0.201046 | 0.213746 | 0.227332 | 0.233822 | 0.238801 |
| 0.252288 |          |          |          |          |
| 0.261323 | 0.276251 | 0.282997 | 0.298527 | 0.304141 |
| 0.305203 |          |          |          |          |
| 0.305970 | 0.306863 | 0.307947 | 0.312678 | 0.321083 |
| 0.365209 |          |          |          |          |
| 0.396169 | 0.407953 | 0.465660 | 0.537983 | 0.590756 |
| 0.601848 |          |          |          |          |
| 0.788391 | 0.814588 | 0.858671 | 0.874017 |          |

Minimum Search - Taking Simple RFO Step  
Searching for Lamda that Minimizes Along All modes  
Value Taken Lamda = -0.00000087  
Step Taken. Stepsize is 0.002106

|               | Maximum   | Tolerance | Cnvgd? |
|---------------|-----------|-----------|--------|
| Gradient      | 0.000249  | 0.000300  | YES    |
| Displacement  | 0.000870  | 0.001200  | YES    |
| Energy change | -0.000007 | 0.000001  | NO     |

```

#####
# Entering anlman.exe on Sun May 20 07:43:28 2012 #
#####

```

Analysis of SCF Wavefunction

Total job wall time: 2.8e+006 s

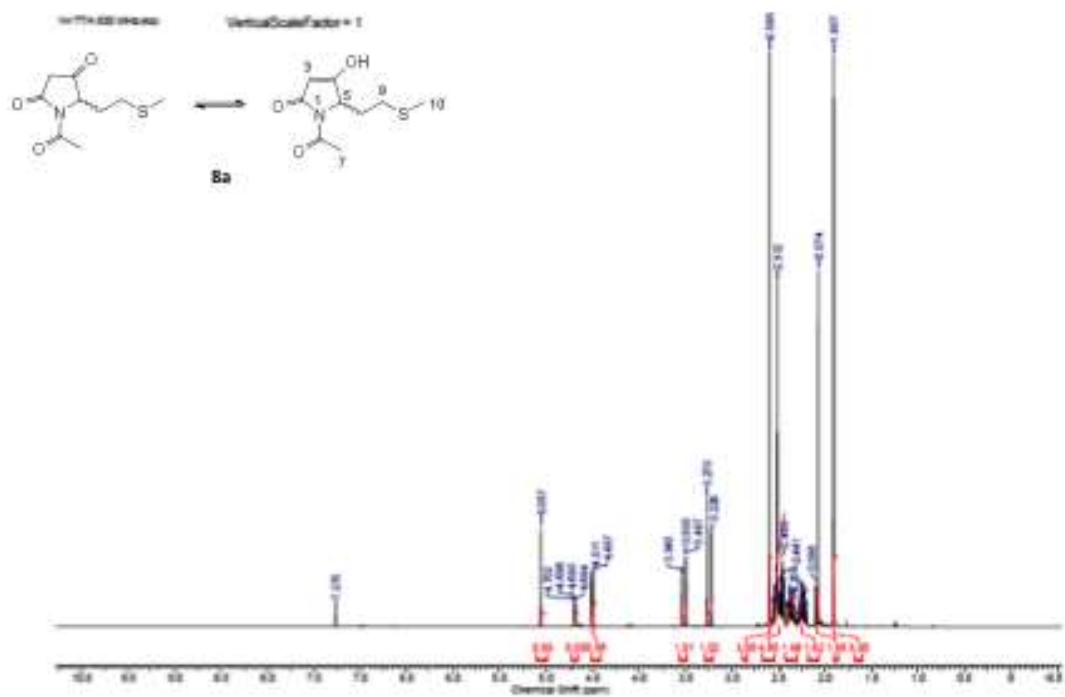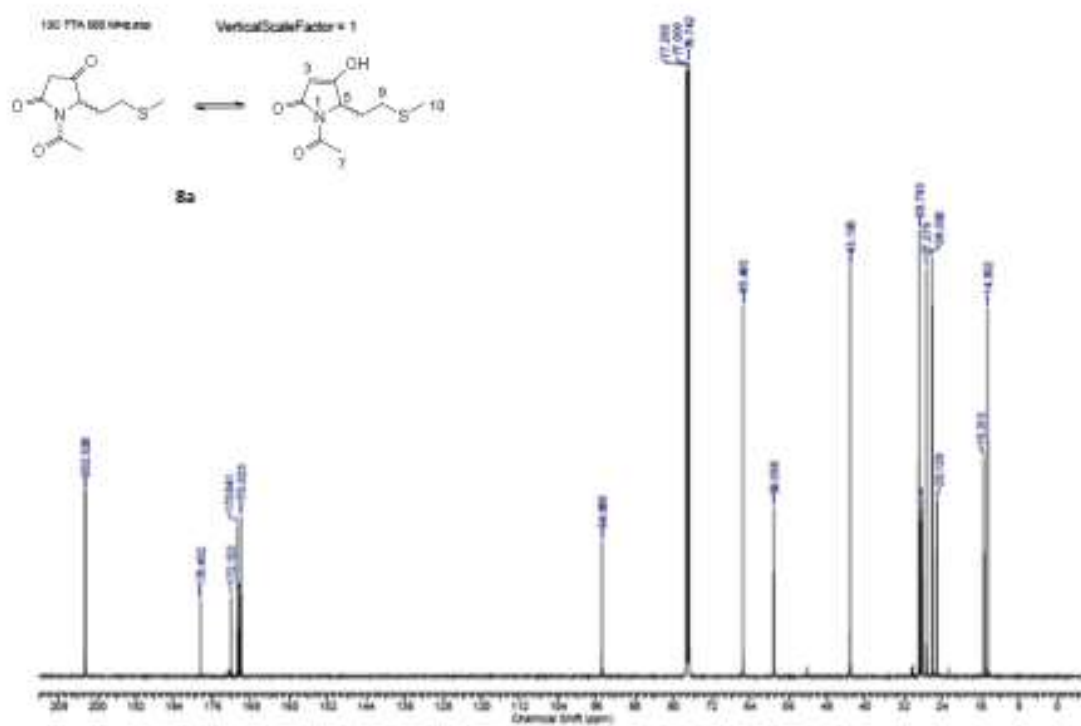



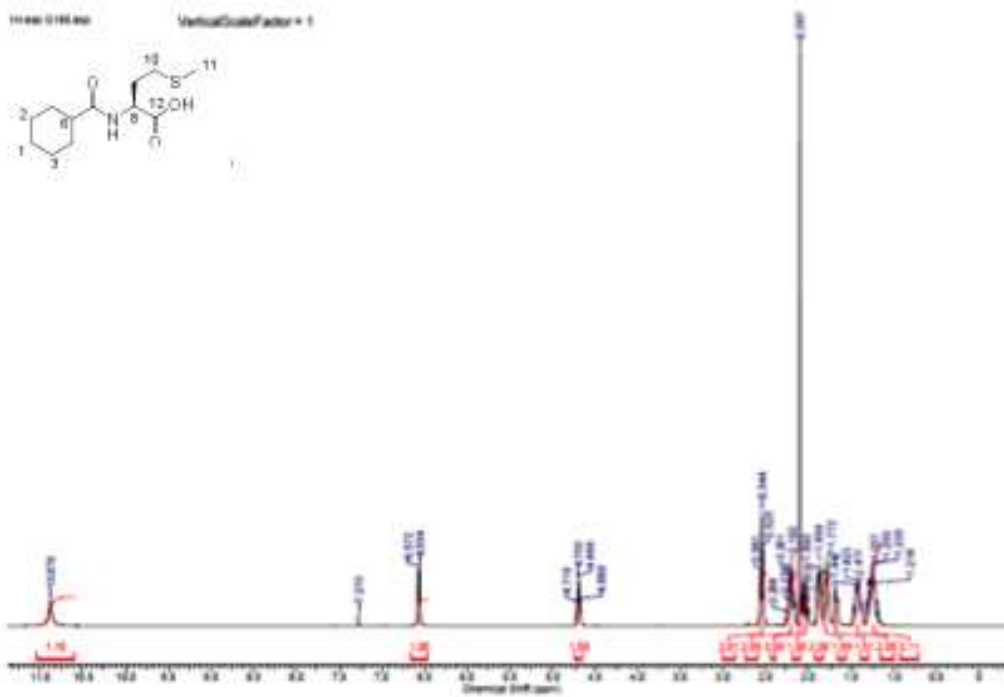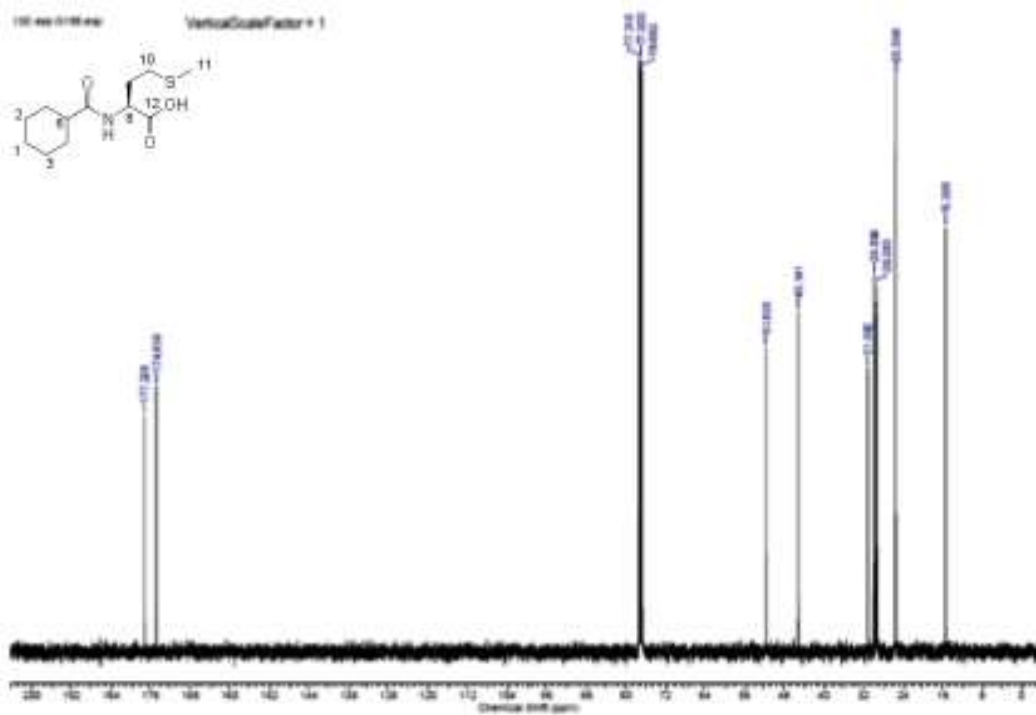



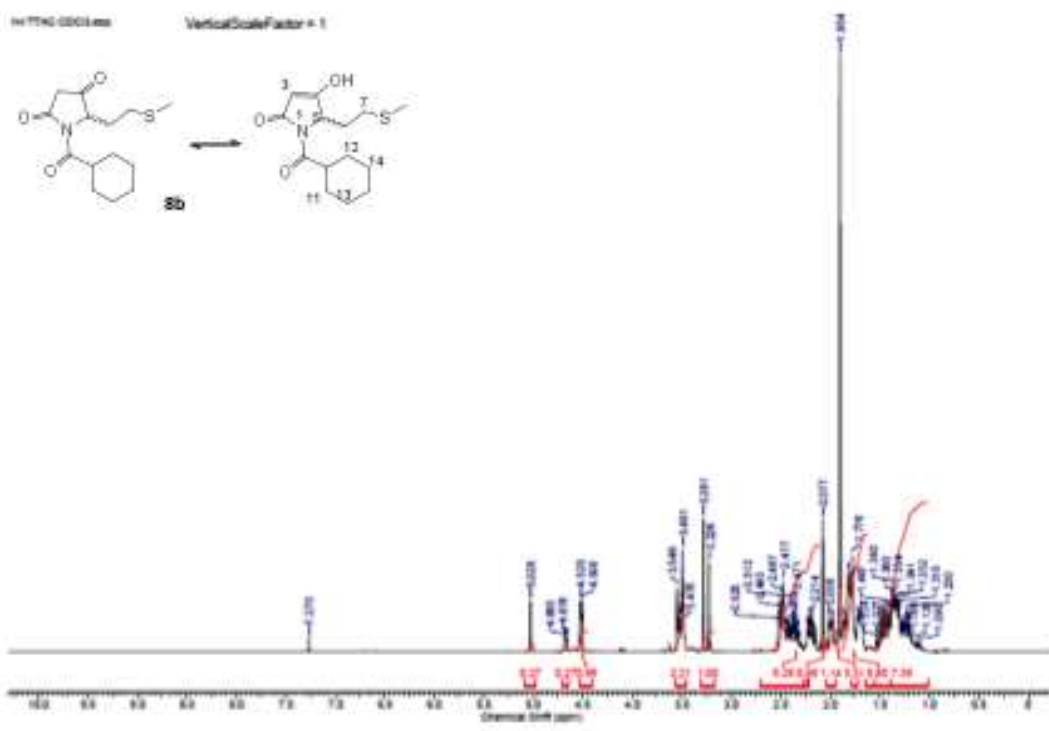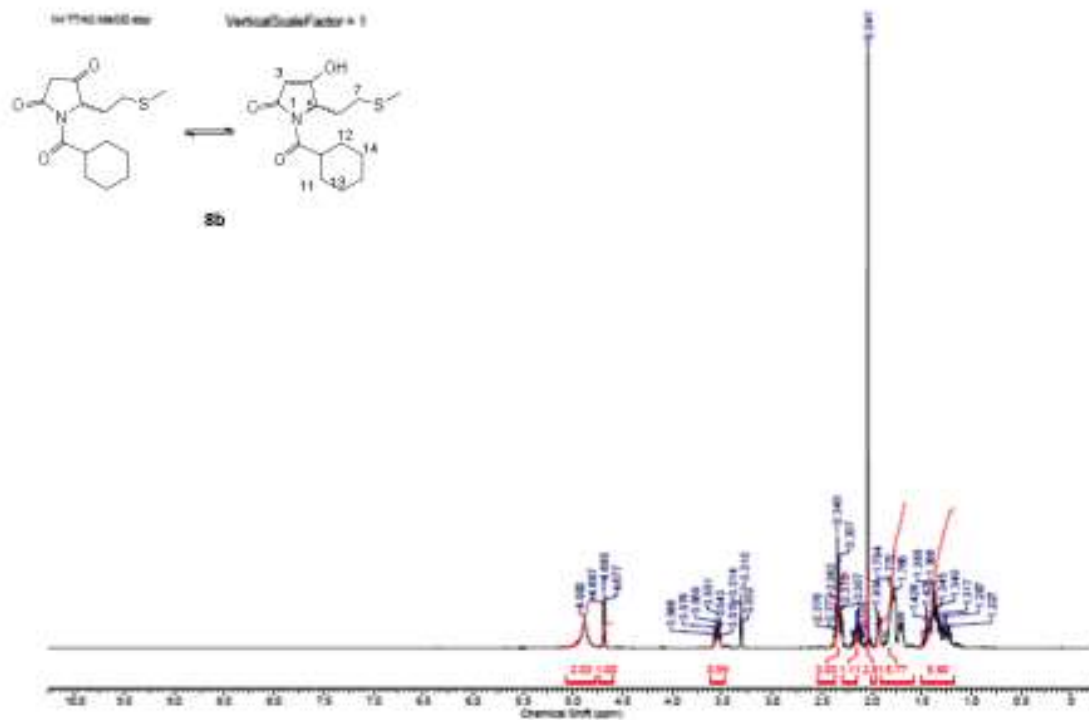

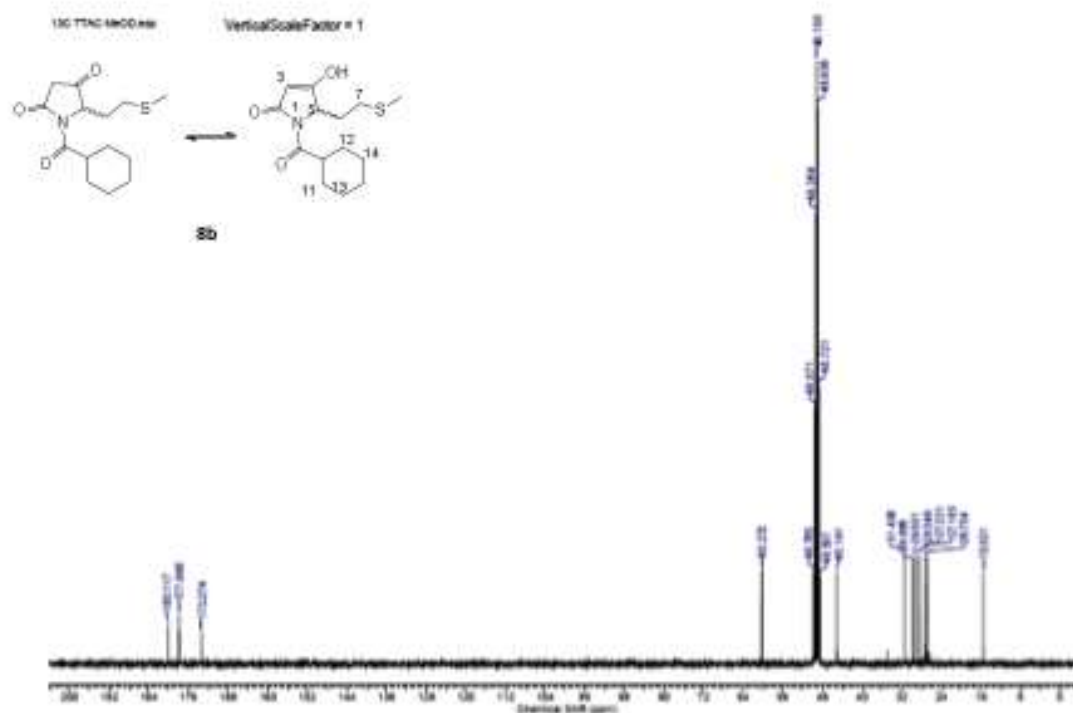

**Table S1:** LipE values of tetramates

|           | <b>S1</b> | <b>S26</b> | <b>S4</b> | <b>S2</b> | <b>E1</b> | <b>E2</b> | <b>P1</b> | <b>P9</b> | <b>P9B</b> | <b>H3</b> | <b>H4</b> |
|-----------|-----------|------------|-----------|-----------|-----------|-----------|-----------|-----------|------------|-----------|-----------|
| <b>2a</b> | 3.21      | 2.91       | 2.91      | 2.91      | 2.91      | 2.91      | 2.61      | 2.91      | 2.31       | 2.61      | 3.21      |
| <b>2b</b> | 3.63      | 3.63       | 3.63      | 3.33      | 3.33      | 3.03      | 3.03      | 3.03      | -          | 3.33      | 2.08      |
| <b>2c</b> | 3.31      | 3.31       | 3.31      | 3.31      | 3.31      | 3.31      | 3.00      | 3.31      | 3.31       | 3.60      | 4.81      |
| <b>2d</b> | 3.5       | 3.5        | 3.5       | 3.5       | 3.5       | 3.5       | 3.20      | 3.80      | 3.20       | 3.80      | 4.72      |
| <b>2e</b> | 2.37      | 1.46       | 1.46      | 1.46      | 1.76      | 2.91      | 2.07      | 2.67      | 2.07       | 0.86      | 3.67      |
| <b>2f</b> | 0.28      | 0.28       | 0.28      | 0.28      | 0.28      | 0.28      | 0.32      | 0.92      | 0.32       | 0.32      | 0.32      |
| <b>2g</b> | 3.13      | 3.13       | 3.13      | 3.13      | 2.83      | 3.13      | 2.83      | 2.22      | 2.83       | 3.13      | 3.43      |
| <b>2h</b> | 2.55      | 2.55       | 2.55      | 2.55      | 2.55      | 2.55      | 2.93      | 2.25      | 1.04       | 1.04      | 1.95      |
| <b>3a</b> | 2.92      | 2.92       | 3.23      | 2.92      | 3.53      | 3.53      | 3.83      | 3.83      | 3.83       | 2.92      | 2.92      |
| <b>3b</b> | 3.17      | 2.87       | 3.47      | 3.17      | 3.77      | 3.47      | 4.07      | 4.07      | 4.07       | 2.87      | 3.77      |
| <b>3c</b> | 3.82      | 3.22       | 3.22      | 3.53      | 3.82      | 3.53      | 3.82      | 3.82      | 3.82       | 3.22      | 4.13      |
| <b>3d</b> | 3.62      | 2.71       | 3.02      | 3.02      | 3.62      | 3.32      | 3.62      | 3.62      | 3.92       | 2.71      | 3.92      |
| <b>3e</b> | 2.97      | 2.97       | 2.97      | 2.97      | 2.97      | 2.97      | 2.97      | 2.97      | 2.97       | 2.97      | 2.97      |
| <b>3f</b> | 3.36      | 3.36       | 3.36      | 3.36      | 3.36      | 3.36      | 3.36      | 3.36      | 3.36       | 3.36      | 3.36      |

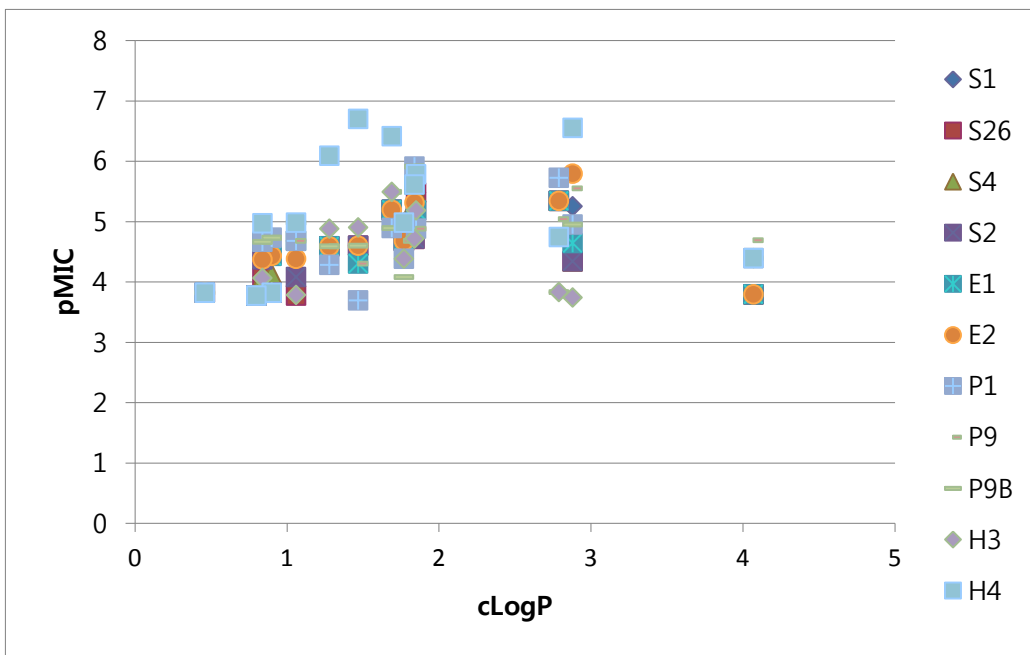

**Figure S1:** Plot of cLogP versus pMIC for the compounds shown in Table S1.
